# Supplementary material for: Recent changes to adult national immunization programs for pneumococcal vaccination in Europe and how they impact coverage: A systematic review of published and grey literature
Source: PubMed Central journal article supplement — Hum Vaccin Immunother. 2023 Nov 28;19(3):2279394. doi: 10.1080/21645515.2023.2279394 (PMC10760380; doi:10.1080/21645515.2023.2279394), 2023-11-28
Supplement: KHVI_A_2279394_SM3565.pdf [file KHVI_A_2279394_SM3565.pdf]

## Supplementary tables

Table S1: PICOST criteria for study inclusion

| Criteria             | Inclusion Criteria                                                                                                                                                                                                                                                                                                                                                                                                                                                                                                                                                                                                                                                                                                                                                                                                                                                                                                                                                                                |
|----------------------|---------------------------------------------------------------------------------------------------------------------------------------------------------------------------------------------------------------------------------------------------------------------------------------------------------------------------------------------------------------------------------------------------------------------------------------------------------------------------------------------------------------------------------------------------------------------------------------------------------------------------------------------------------------------------------------------------------------------------------------------------------------------------------------------------------------------------------------------------------------------------------------------------------------------------------------------------------------------------------------------------|
| <b>Population(s)</b> | Adult population included in pneumococcal vaccination recommendations                                                                                                                                                                                                                                                                                                                                                                                                                                                                                                                                                                                                                                                                                                                                                                                                                                                                                                                             |
| <b>Interventions</b> | All pneumococcal vaccines indicated for adults (PCV13 and PPV23)                                                                                                                                                                                                                                                                                                                                                                                                                                                                                                                                                                                                                                                                                                                                                                                                                                                                                                                                  |
| <b>Comparisons</b>   | Not applicable                                                                                                                                                                                                                                                                                                                                                                                                                                                                                                                                                                                                                                                                                                                                                                                                                                                                                                                                                                                    |
| <b>Outcomes</b>      | <ul style="list-style-type: none"> <li>• Consideration of change to NIP for adults</li> <li>• Recommendation <ul style="list-style-type: none"> <li>○ NIP decision</li> <li>○ Target populations implemented (Age group, health status)</li> <li>○ Planned dates for any future recommendations (if available)</li> </ul> </li> <li>• Presence of epidemiological data of IPD/Pneumonia (Yes/No) <ul style="list-style-type: none"> <li>○ Incidence</li> <li>○ Prevalence</li> <li>○ Mortality</li> <li>○ % Attributable to <i>S. pneumoniae</i></li> </ul> </li> <li>• Economic data <ul style="list-style-type: none"> <li>○ Description of health economic models</li> <li>○ Description of major assumptions in model</li> <li>○ Model inputs for costs, utilities, epidemiologic, resource use, etc.</li> <li>○ Outcomes presented</li> <li>○ Conclusion</li> <li>○ References for SLR, if conducted</li> </ul> </li> <li>• HTA/NITAG critiques of evidence</li> <li>• Adult VCRs</li> </ul> |
| <b>Study design</b>  | <ul style="list-style-type: none"> <li>• Technology Appraisal Guidance</li> <li>• All types of appraisal reports, including extensions of recommendations</li> <li>• updates of reports and new reports</li> <li>• Any NITAG report providing data related to vaccine coverage rates</li> <li>• Any published literature reporting PV recommendations for adults</li> </ul> <p>Any published literature reporting VCRs</p>                                                                                                                                                                                                                                                                                                                                                                                                                                                                                                                                                                        |
| <b>Time</b>          | Published since 1 January 2017                                                                                                                                                                                                                                                                                                                                                                                                                                                                                                                                                                                                                                                                                                                                                                                                                                                                                                                                                                    |
| <b>Other</b>         | Austria, Belgium, Bulgaria, Croatia, Cyprus, Czech Republic, Denmark, Estonia, Finland, France, Germany, Greece, Hungary, Iceland, Ireland, Italy, Latvia, Lithuania, Luxembourg, the Netherlands, Norway, Poland, Portugal, Republic of Malta, Romania, Slovakia, Slovenia, Spain, Sweden, Switzerland, the UK                                                                                                                                                                                                                                                                                                                                                                                                                                                                                                                                                                                                                                                                                   |

Table S2: List of HTA agency and NITAG websites

| Country        | Source                                        | URL                                                                                                                                                                                                                                                                                                                                                                                                                                                                                                                                |
|----------------|-----------------------------------------------|------------------------------------------------------------------------------------------------------------------------------------------------------------------------------------------------------------------------------------------------------------------------------------------------------------------------------------------------------------------------------------------------------------------------------------------------------------------------------------------------------------------------------------|
| Austria        | LBI (1)                                       | <a href="https://bim.lbg.ac.at/en">https://bim.lbg.ac.at/en</a>                                                                                                                                                                                                                                                                                                                                                                                                                                                                    |
|                | AIHTA (2)                                     | <a href="https://aihta.at/page/homepage/en">https://aihta.at/page/homepage/en</a>                                                                                                                                                                                                                                                                                                                                                                                                                                                  |
|                | GOeG (3)                                      | <a href="https://goeg.at/">https://goeg.at/</a>                                                                                                                                                                                                                                                                                                                                                                                                                                                                                    |
| Belgium        | KCE (4)                                       | <a href="https://kce.fgov.be/en">https://kce.fgov.be/en</a><br><i>Superior Health Council:</i> <a href="https://www.health.belgium.be/nl/advies-9519-vaccinatie-tegen-pneumokokken-kinderen">https://www.health.belgium.be/nl/advies-9519-vaccinatie-tegen-pneumokokken-kinderen</a><br><i>KCE:</i><br><a href="https://kce.fgov.be/nl/een-gunstig-advies-van-het-kce-voor-de-terugbetaling-van-het-pneumokokkenvaccin">https://kce.fgov.be/nl/een-gunstig-advies-van-het-kce-voor-de-terugbetaling-van-het-pneumokokkenvaccin</a> |
|                | WIV-ISP (5)                                   | <a href="https://www.sciensano.be/en">https://www.sciensano.be/en</a>                                                                                                                                                                                                                                                                                                                                                                                                                                                              |
| Bulgaria       | NCPHA (6)                                     | <a href="https://ncpha.government.bg/">https://ncpha.government.bg/</a>                                                                                                                                                                                                                                                                                                                                                                                                                                                            |
|                | NCPR (7)                                      | <a href="https://www.ncpr.bg/bg/">https://www.ncpr.bg/bg/</a>                                                                                                                                                                                                                                                                                                                                                                                                                                                                      |
| Croatia        | HZJZ (8)                                      | <a href="https://www.hzjz.hr/en/">https://www.hzjz.hr/en/</a>                                                                                                                                                                                                                                                                                                                                                                                                                                                                      |
| Cyprus         | MOH (9)                                       | <a href="https://www.moh.gov.cy/MOH/MOH.nsf/All/B132061A6C8F10F7C2257AFB003E0096?OpenDocument">https://www.moh.gov.cy/MOH/MOH.nsf/All/B132061A6C8F10F7C2257AFB003E0096?OpenDocument</a>                                                                                                                                                                                                                                                                                                                                            |
| Czech Republic | Pediatric Cerna (10)                          | <a href="https://www.pediatricerna.cz/">https://www.pediatricerna.cz/</a>                                                                                                                                                                                                                                                                                                                                                                                                                                                          |
|                | SUKL (11)                                     | <a href="http://www.sukl.eu/">http://www.sukl.eu/</a>                                                                                                                                                                                                                                                                                                                                                                                                                                                                              |
| Denmark        | SST (12)                                      | <a href="https://www.sst.dk/da/opgaver/forebyggelse/boernevaccinationsprogrammet/vaccinationsudvalget">https://www.sst.dk/da/opgaver/forebyggelse/boernevaccinationsprogrammet/vaccinationsudvalget</a>                                                                                                                                                                                                                                                                                                                            |
|                | SSI (13)                                      | <a href="http://www.ssi.dk">www.ssi.dk</a>                                                                                                                                                                                                                                                                                                                                                                                                                                                                                         |
| Estonia        | RATERA (14)                                   | <a href="https://tervis.ut.ee/en">https://tervis.ut.ee/en</a>                                                                                                                                                                                                                                                                                                                                                                                                                                                                      |
| Finland        | THL (KRAR) (15)                               | <a href="https://thl.fi/fi/">https://thl.fi/fi/</a><br><a href="https://thl.fi/fi/web/infektiaudit-ja-rokotukset/palvelut-ja-yhteystiedot/asiantuntijaryhmat/kansallinen-rokotusasiantuntijaryhma-krar">https://thl.fi/fi/web/infektiaudit-ja-rokotukset/palvelut-ja-yhteystiedot/asiantuntijaryhmat/kansallinen-rokotusasiantuntijaryhma-krar</a>                                                                                                                                                                                 |
| France         | CTV (16)                                      | <a href="https://www.has-sante.fr/jcms/c_2755844/fr/commission-technique-des-vaccinations">https://www.has-sante.fr/jcms/c_2755844/fr/commission-technique-des-vaccinations</a>                                                                                                                                                                                                                                                                                                                                                    |
|                | HCSP (17)                                     | <a href="https://www.hcsp.fr/Explore.cgi/AvisRapports">https://www.hcsp.fr/Explore.cgi/AvisRapports</a>                                                                                                                                                                                                                                                                                                                                                                                                                            |
| Germany        | STIKO (18)                                    | <a href="https://www.rki.de/EN/Content/infections/Vaccination/Vaccination_node.html">https://www.rki.de/EN/Content/infections/Vaccination/Vaccination_node.html</a>                                                                                                                                                                                                                                                                                                                                                                |
|                | IQWIG (19)                                    | <a href="https://www.iqwig.de/en/">https://www.iqwig.de/en/</a>                                                                                                                                                                                                                                                                                                                                                                                                                                                                    |
|                | DIMDI (20)                                    | <a href="http://www.dimdi.de/static/de/index.html">http://www.dimdi.de/static/de/index.html</a>                                                                                                                                                                                                                                                                                                                                                                                                                                    |
| Greece         | EEE (21)                                      | <a href="https://www.moh.gov.gr/articles/health/dieythynsh-dhmosias-ygieinhs/emboliasmoi/ethnikh-epitroph-emboliasmwn">https://www.moh.gov.gr/articles/health/dieythynsh-dhmosias-ygieinhs/emboliasmoi/ethnikh-epitroph-emboliasmwn</a>                                                                                                                                                                                                                                                                                            |
| Hungary        | VACSATC (22)                                  | <a href="http://vacsatc.hu/?Information-in-English&amp;pid=65">http://vacsatc.hu/?Information-in-English&amp;pid=65</a>                                                                                                                                                                                                                                                                                                                                                                                                            |
|                | OGUYÉI (23)                                   | <a href="https://www.ogyei.gov.hu/main_page">https://www.ogyei.gov.hu/main_page</a>                                                                                                                                                                                                                                                                                                                                                                                                                                                |
| Ireland        | National Immunisation Advisory Committee (24) | <a href="https://www.rcpi.ie/policy-and-advocacy/national-immunisation-advisory-committee/">https://www.rcpi.ie/policy-and-advocacy/national-immunisation-advisory-committee/</a>                                                                                                                                                                                                                                                                                                                                                  |
|                | National Immunisation Office (25)             | <a href="https://www.hse.ie/eng/health/immunisation/">https://www.hse.ie/eng/health/immunisation/</a>                                                                                                                                                                                                                                                                                                                                                                                                                              |

| Country           | Source                                               | URL                                                                                                                                                                                                                                                                                                                                  |
|-------------------|------------------------------------------------------|--------------------------------------------------------------------------------------------------------------------------------------------------------------------------------------------------------------------------------------------------------------------------------------------------------------------------------------|
|                   | HIQA (26)                                            | <a href="https://www.hiqa.ie/">https://www.hiqa.ie/</a>                                                                                                                                                                                                                                                                              |
|                   | NCPE (27)                                            | <a href="http://www.ncpe.ie/">http://www.ncpe.ie/</a>                                                                                                                                                                                                                                                                                |
| Italy             | ISS (28)                                             | <a href="https://www.iss.it/">https://www.iss.it/</a>                                                                                                                                                                                                                                                                                |
|                   | AIFA (29)                                            | <a href="https://www.aifa.gov.it/en/web/guest/home">https://www.aifa.gov.it/en/web/guest/home</a>                                                                                                                                                                                                                                    |
| Latvia            | Imunizācijas valsts padome (30)                      | <a href="http://www.vm.gov.lv/lv/ministrija/konsultativas_padomes/imunizācijas_valsts_padome/">http://www.vm.gov.lv/lv/ministrija/konsultativas_padomes/imunizācijas_valsts_padome/</a>                                                                                                                                              |
| Lithuania         | ULAC (31)                                            | <a href="http://www.ulac.lt/">http://www.ulac.lt/</a>                                                                                                                                                                                                                                                                                |
|                   | HI (32)                                              | <a href="http://www.hi.lt/en/">http://www.hi.lt/en/</a>                                                                                                                                                                                                                                                                              |
| Luxembourg        | CSMI (33)                                            | <a href="https://sante.public.lu/fr/espace-professionnel/recommandations/conseil-maladies-infectieuses.html">https://sante.public.lu/fr/espace-professionnel/recommandations/conseil-maladies-infectieuses.html</a>                                                                                                                  |
| Netherlands       | Gezondheidsraad (34)                                 | <a href="https://www.healthcouncil.nl/">https://www.healthcouncil.nl/</a> or <a href="https://www.gezondheidsraad.nl/">https://www.gezondheidsraad.nl/</a>                                                                                                                                                                           |
|                   | RIVM (35)                                            | <a href="https://www.rivm.nl/">https://www.rivm.nl/</a>                                                                                                                                                                                                                                                                              |
|                   | Zorginstituut Nederland (36)                         | <a href="https://www.zorginstituutnederland.nl/">https://www.zorginstituutnederland.nl/</a>                                                                                                                                                                                                                                          |
| Poland            | Rada sanitarno-epidemiologiczna (37)                 | <a href="https://gis.gov.pl/bip_list/rada-sanitarno-epidemiologiczna/">https://gis.gov.pl/bip_list/rada-sanitarno-epidemiologiczna/</a>                                                                                                                                                                                              |
|                   | AOTMiT (38)                                          | <a href="http://www.aotm.gov.pl/www/">http://www.aotm.gov.pl/www/</a>                                                                                                                                                                                                                                                                |
| Portugal          | CTV (39)                                             | <a href="https://comissaovacinao.webnode.pt/">https://comissaovacinao.webnode.pt/</a>                                                                                                                                                                                                                                                |
|                   | DGS (40)                                             | <a href="https://www.dgs.pt/">https://www.dgs.pt/</a>                                                                                                                                                                                                                                                                                |
| Republic of Malta | DPA/MoH Malta (41)                                   | <a href="https://deputyprimeminister.gov.mt/en/Pages/health.aspx">https://deputyprimeminister.gov.mt/en/Pages/health.aspx</a><br><a href="https://deputyprimeminister.gov.mt/en/phc/pchyhi/Pages/National-Immunisation-Schedule.aspx">https://deputyprimeminister.gov.mt/en/phc/pchyhi/Pages/National-Immunisation-Schedule.aspx</a> |
| Romania           | MS (42)                                              | <a href="http://www.ms.ro/">http://www.ms.ro/</a>                                                                                                                                                                                                                                                                                    |
|                   | INSP (43)                                            | <a href="https://www.insp.gov.ro/">https://www.insp.gov.ro/</a>                                                                                                                                                                                                                                                                      |
|                   | CNSCBT (44)                                          | <a href="http://www.cnscbt.ro/">http://www.cnscbt.ro/</a>                                                                                                                                                                                                                                                                            |
| Slovakia          | Ministry of Health (45)                              | <a href="http://kategorizacia.mzsr.sk/Lieky/Common/Details/9376">http://kategorizacia.mzsr.sk/Lieky/Common/Details/9376</a>                                                                                                                                                                                                          |
| Slovenia          | PSC (46)                                             | <a href="http://www.nijz.si/">http://www.nijz.si/</a>                                                                                                                                                                                                                                                                                |
|                   | JAZMP (47)                                           | <a href="https://www.jazmp.si/en/">https://www.jazmp.si/en/</a>                                                                                                                                                                                                                                                                      |
|                   | MoH (48)                                             | <a href="http://www.mz.gov.si/en/">http://www.mz.gov.si/en/</a>                                                                                                                                                                                                                                                                      |
| Spain             | Ponencia de Programa y Registro de Vacunaciones (49) | <a href="https://www.mscbs.gob.es/organizacion/consejoInterterri/home.htm">https://www.mscbs.gob.es/organizacion/consejoInterterri/home.htm</a>                                                                                                                                                                                      |
|                   | AETS (50)                                            | <a href="https://www.isciii.es/QuienesSomos/CentrosPropios/AETS/Paginas/default.aspx">https://www.isciii.es/QuienesSomos/CentrosPropios/AETS/Paginas/default.aspx</a>                                                                                                                                                                |
|                   | AEMPS (51)                                           | <a href="https://www.aemps.gob.es/">https://www.aemps.gob.es/</a>                                                                                                                                                                                                                                                                    |
| Sweden            | Public Health Agency of Sweden (52)                  | <a href="https://www.folkhalsomyndigheten.se/the-public-health-agency-of-sweden/">https://www.folkhalsomyndigheten.se/the-public-health-agency-of-sweden/</a>                                                                                                                                                                        |
| <b>NON-EU</b>     |                                                      |                                                                                                                                                                                                                                                                                                                                      |

| Country        | Source                                            | URL                                                                                                                                                                                                                                                                                                                 |
|----------------|---------------------------------------------------|---------------------------------------------------------------------------------------------------------------------------------------------------------------------------------------------------------------------------------------------------------------------------------------------------------------------|
| Iceland        | Directorate of Health (Embaetti Landlaeknir) (53) | <a href="https://www.landlaeknir.is/">https://www.landlaeknir.is/</a>                                                                                                                                                                                                                                               |
| Norway         | FHI (54)                                          | <a href="https://www.fhi.no/en/">https://www.fhi.no/en/</a>                                                                                                                                                                                                                                                         |
|                | HDIR (55)                                         | <a href="https://helsedirektoratet.no/english">https://helsedirektoratet.no/english</a>                                                                                                                                                                                                                             |
|                | NOMA (56)                                         | <a href="http://www.legemiddelverket.no">www.legemiddelverket.no</a>                                                                                                                                                                                                                                                |
| Switzerland    | FOPH (57)                                         | <a href="https://www.bag.admin.ch/bag/de/home/krankheiten/krankheiten-im-ueberblick/pneumokokken-erkrankungen.html">https://www.bag.admin.ch/bag/de/home/krankheiten/krankheiten-im-ueberblick/pneumokokken-erkrankungen.html</a>                                                                                   |
|                | CFV (58)                                          | <a href="https://www.bag.admin.ch/bag/fr/home/das-bag/organisation/ausserparlamentarische-kommissionen/eidgenoessische-kommission-fuer-impffragen-ekif.html">https://www.bag.admin.ch/bag/fr/home/das-bag/organisation/ausserparlamentarische-kommissionen/eidgenoessische-kommission-fuer-impffragen-ekif.html</a> |
| United Kingdom | JCVI (59)                                         | <a href="https://www.gov.uk/government/groups/joint-committee-on-vaccination-and-immunisation">https://www.gov.uk/government/groups/joint-committee-on-vaccination-and-immunisation</a>                                                                                                                             |
|                | NICE (60)                                         | <a href="https://www.nice.org.uk/">https://www.nice.org.uk/</a>                                                                                                                                                                                                                                                     |
|                | SMC (61)                                          | <a href="https://www.scottishmedicines.org.uk/">https://www.scottishmedicines.org.uk/</a>                                                                                                                                                                                                                           |
|                | AWMSG (62)                                        | <a href="http://www.awmsg.org/">http://www.awmsg.org/</a>                                                                                                                                                                                                                                                           |
|                | HTW (63)                                          | <a href="https://www.healthtechnology.wales/">https://www.healthtechnology.wales/</a>                                                                                                                                                                                                                               |
|                | NIHR (64)                                         | <a href="https://www.nihr.ac.uk/">https://www.nihr.ac.uk/</a>                                                                                                                                                                                                                                                       |

Table S3: PubMed® search terms

| Facet No | Objective     | Search terms                                                                                                                                                                                                                                                                                                                                                                                                                                                                                                                                                                                                                                                                                                                                                                                                                                                                                                                                                                                                                                                                                                                                                                                                                                                                                                                                                                                                                                                                                                                                                                                                                                                                                                                                                                                                                                                                                                                                                                                                                                                                                                                                                                                                                                                                                                                                                                                 | Hits      |
|----------|---------------|----------------------------------------------------------------------------------------------------------------------------------------------------------------------------------------------------------------------------------------------------------------------------------------------------------------------------------------------------------------------------------------------------------------------------------------------------------------------------------------------------------------------------------------------------------------------------------------------------------------------------------------------------------------------------------------------------------------------------------------------------------------------------------------------------------------------------------------------------------------------------------------------------------------------------------------------------------------------------------------------------------------------------------------------------------------------------------------------------------------------------------------------------------------------------------------------------------------------------------------------------------------------------------------------------------------------------------------------------------------------------------------------------------------------------------------------------------------------------------------------------------------------------------------------------------------------------------------------------------------------------------------------------------------------------------------------------------------------------------------------------------------------------------------------------------------------------------------------------------------------------------------------------------------------------------------------------------------------------------------------------------------------------------------------------------------------------------------------------------------------------------------------------------------------------------------------------------------------------------------------------------------------------------------------------------------------------------------------------------------------------------------------|-----------|
| 1        | Population    | "Austria"[Title/Abstract] OR "Austrian"[Title/Abstract] OR "Belgium"[Title/Abstract] OR "Belgian"[Title/Abstract] OR "Bulgaria"[Title/Abstract] OR "Bulgars"[Title/Abstract] OR "Bulgarian"[Title/Abstract] OR "Croatia"[Title/Abstract] OR "Croats"[Title/Abstract] OR "Croatians"[Title/Abstract] OR "Cyprus"[Title/Abstract] OR "Cypriot"[Title/Abstract] OR "Czech republic"[Title/Abstract] OR "Czechs"[Title/Abstract] OR "Denmark"[Title/Abstract] OR "Danish"[Title/Abstract] OR "Danes"[Title/Abstract] OR "Estonia"[Title/Abstract] OR "Estonian"[Title/Abstract] OR "Finland"[Title/Abstract] OR "Finns"[Title/Abstract] OR "Finnish"[Title/Abstract] OR "France"[Title/Abstract] OR "French"[Title/Abstract] OR "Germany"[Title/Abstract] OR "Germans"[Title/Abstract] OR "Greece"[Title/Abstract] OR "Greek"[Title/Abstract] OR "Hungary"[Title/Abstract] OR "Hungarian"[Title/Abstract] OR "Magyar"[Title/Abstract] OR "Iceland"[Title/Abstract] OR "Icelander"[Title/Abstract] OR "Icelandic"[Title/Abstract] OR "Ireland"[Title/Abstract] OR "Irish"[Title/Abstract] OR "Italy"[Title/Abstract] OR "Italian"[Title/Abstract] OR "Latvia"[Title/Abstract] OR "Letts"[Title/Abstract] OR "Latvian"[Title/Abstract] OR "Lithuania"[Title/Abstract] OR "Lithuanian"[Title/Abstract] OR "Luxembourg"[Title/Abstract] OR "Luxembourgish"[Title/Abstract] OR "Netherlands"[Title/Abstract] OR "Dutch"[Title/Abstract] OR "Nederlander"[Title/Abstract] OR "Norway"[Title/Abstract] OR "Norwegian"[Title/Abstract] OR "Poland"[Title/Abstract] OR "Polish"[Title/Abstract] OR "Poles"[Title/Abstract] OR "Portugal"[Title/Abstract] OR "Portuguese"[Title/Abstract] OR "Malta"[Title/Abstract] OR "Maltese"[Title/Abstract] OR "Romania"[Title/Abstract] OR "Romanians"[Title/Abstract] OR "Slovakia"[Title/Abstract] OR "Slovak"[Title/Abstract] OR "Slovenia"[Title/Abstract] OR "Slovenian"[Title/Abstract] OR "Slovenes"[Title/Abstract] OR "Spain"[Title/Abstract] OR "Spanish"[Title/Abstract] OR "Sweden"[Title/Abstract] OR "Swedish"[Title/Abstract] OR "Switzerland"[Title/Abstract] OR "Swiss"[Title/Abstract] OR "United Kingdom"[Title/Abstract] OR "UK"[Title/Abstract] OR "British"[Title/Abstract] OR "Europe"[MeSH Terms] OR "Europe"[Title/Abstract] OR "europa"[Title/Abstract] OR "european"[Title/Abstract] OR "Europe"[Title/Abstract] OR "EU"[Title/Abstract] | 2,227,752 |
| 2        | Exposure      | "PCV"[Title/Abstract] OR "Pneumococcal Conjugate Vaccine"[Title/Abstract] OR (("pneumococcal vaccines"[MeSH Terms] OR ("pneumococcal"[All Fields] AND "vaccines"[All Fields]) OR "pneumococcal vaccines"[All Fields] OR "pneumococcal"[All Fields]) AND "vaccines, conjugate"[MeSH Terms])                                                                                                                                                                                                                                                                                                                                                                                                                                                                                                                                                                                                                                                                                                                                                                                                                                                                                                                                                                                                                                                                                                                                                                                                                                                                                                                                                                                                                                                                                                                                                                                                                                                                                                                                                                                                                                                                                                                                                                                                                                                                                                   | 10,891    |
| 3        | Study design* | "Health technology assessment" [Title/Abstract] OR "HTA" [Title/Abstract] OR "cost-effective"[Title/Abstract] OR "health economic"[Title/Abstract] OR "recommendation"[Title/Abstract] OR NITAG[Title/Abstract] OR "National Immunization Technical Advisory Groups"[Title/Abstract]                                                                                                                                                                                                                                                                                                                                                                                                                                                                                                                                                                                                                                                                                                                                                                                                                                                                                                                                                                                                                                                                                                                                                                                                                                                                                                                                                                                                                                                                                                                                                                                                                                                                                                                                                                                                                                                                                                                                                                                                                                                                                                         | 172,257   |

|   |                                        |                                                                                                                                                                                                                                                                                                                                                                                                                                                                                                                                                                                                                                                                                                                                                                                                                                                                                                                                                                                                                                       |              |
|---|----------------------------------------|---------------------------------------------------------------------------------------------------------------------------------------------------------------------------------------------------------------------------------------------------------------------------------------------------------------------------------------------------------------------------------------------------------------------------------------------------------------------------------------------------------------------------------------------------------------------------------------------------------------------------------------------------------------------------------------------------------------------------------------------------------------------------------------------------------------------------------------------------------------------------------------------------------------------------------------------------------------------------------------------------------------------------------------|--------------|
| 4 | Epidemiology                           | inciden*[Title/Abstract] OR prevalen*[Title/Abstract] OR mortality [Title/Abstract] OR casualit*[Title/Abstract] OR death[Title/Abstract] OR deaths[Title/Abstract] OR died[Title/Abstract] OR "New cases"[Title/Abstract]                                                                                                                                                                                                                                                                                                                                                                                                                                                                                                                                                                                                                                                                                                                                                                                                            | 3,322,299    |
| 5 | Burden (costs, resource use and HRQoL) | "cost of illness"[All Fields] OR "costs and cost analysis"[MeSH Terms] OR "cost analysis"[All Fields] OR "economic burden"[All Fields] OR "burden of disease"[All Fields] OR "health resources"[MeSH Terms] OR "health resources"[All Fields] OR "resource use"[All Fields] OR "burden"[All Fields] OR "Healthcare resource utilization"[All Fields] OR "expenditure"[All Fields] OR "indirect cost"[All Fields] OR "healthcare cost"[All Fields] OR "hospital cost"[All Fields] OR "hospital costs"[All Fields] OR "in-patient"[All Fields] OR "inpatient"[All Fields] OR "out-patient"[All Fields] OR "outpatient"[All Fields] OR "quality of life"[MeSH Terms] OR "quality of life"[All Fields] OR ("health-related"[All Fields] OR "health related"[All Fields]) AND "quality"[All Fields] AND "life"[All Fields] OR "health-related quality of life"[All Fields] OR "health related quality of life"[All Fields] OR "hrqol"[All Fields] OR "Patient-reported outcomes"[All Fields] OR "EQ-5D"[All Fields] OR "SF-36"[All Fields] | 1,252,073    |
| 6 | VCR for PCV                            | ((("vaccination coverage"[MeSH Terms] OR ("vaccination"[All Fields] AND "coverage"[All Fields]) OR "vaccination coverage"[All Fields]) AND "rate"[All Fields]) OR ("vaccin"[Supplementary Concept] OR "vaccin"[All Fields] OR "vaccination"[MeSH Terms] OR "vaccination"[All Fields] OR "vaccinable"[All Fields] OR "vaccinal"[All Fields] OR "vaccinate"[All Fields] OR "vaccinated"[All Fields] OR "vaccinates"[All Fields] OR "vaccinating"[All Fields] OR "vaccinations"[All Fields] OR "vaccination s"[All Fields] OR "vaccinator"[All Fields] OR "vaccinators"[All Fields] OR "vaccine s"[All Fields] OR "vaccined"[All Fields] OR "vaccines"[MeSH Terms] OR "vaccines"[All Fields] OR "vaccine"[All Fields] OR "vaccins"[All Fields]) AND "rate"[All Fields]) OR ("vaccin*" [All Fields] AND ("rate"[All Fields] OR ("coverage"[All Fields] OR "coverages"[All Fields]) OR ("frequency"[All Fields] OR "frequence"[All Fields] OR "frequencies"[All Fields])))                                                                 | 61,884       |
| 7 | Filters                                | <b>Publication date</b> since Jan 1st, 2017<br><b>Age:</b> Adolescent: 13-18 years, Adult: 19+ years, Adult: 19-44 years, Middle Aged + Aged: 45+ years, Middle Aged: 45-64 years, Aged: 65+ years, 80 and over: 80+ years, Young Adult: 19-24 years                                                                                                                                                                                                                                                                                                                                                                                                                                                                                                                                                                                                                                                                                                                                                                                  | N/A          |
|   |                                        | <b>1 AND 2 - Population</b>                                                                                                                                                                                                                                                                                                                                                                                                                                                                                                                                                                                                                                                                                                                                                                                                                                                                                                                                                                                                           | <b>1,625</b> |
|   |                                        | <b>1 AND 2 AND 3 – Study design</b>                                                                                                                                                                                                                                                                                                                                                                                                                                                                                                                                                                                                                                                                                                                                                                                                                                                                                                                                                                                                   | <b>87</b>    |
|   |                                        | <b>1 AND 2 AND 3 AND 4 – Epidemiology</b>                                                                                                                                                                                                                                                                                                                                                                                                                                                                                                                                                                                                                                                                                                                                                                                                                                                                                                                                                                                             | <b>45</b>    |
|   |                                        | <b>1 AND 2 AND 3 AND 5 – Burden</b>                                                                                                                                                                                                                                                                                                                                                                                                                                                                                                                                                                                                                                                                                                                                                                                                                                                                                                                                                                                                   | <b>60</b>    |
|   |                                        | <b>1 AND 2 AND 6 – VCRs</b>                                                                                                                                                                                                                                                                                                                                                                                                                                                                                                                                                                                                                                                                                                                                                                                                                                                                                                                                                                                                           | <b>490</b>   |
|   |                                        | <b>1 AND 2 AND 6 – VCRs (Time and age limits)</b>                                                                                                                                                                                                                                                                                                                                                                                                                                                                                                                                                                                                                                                                                                                                                                                                                                                                                                                                                                                     | <b>74</b>    |
|   |                                        | <b>1 AND 2 AND 3 (Time and age limits)</b>                                                                                                                                                                                                                                                                                                                                                                                                                                                                                                                                                                                                                                                                                                                                                                                                                                                                                                                                                                                            | <b>16</b>    |
|   |                                        | <b>Total hits – (1 AND 2 AND 3) OR (1 AND 2 AND 6)</b>                                                                                                                                                                                                                                                                                                                                                                                                                                                                                                                                                                                                                                                                                                                                                                                                                                                                                                                                                                                | <b>550</b>   |
|   |                                        | <b>Total hits (Time limit – since Jan 1<sup>st</sup>, 2017)</b>                                                                                                                                                                                                                                                                                                                                                                                                                                                                                                                                                                                                                                                                                                                                                                                                                                                                                                                                                                       | <b>182</b>   |
|   |                                        | <b>Total hits (Time &amp; age limit)</b>                                                                                                                                                                                                                                                                                                                                                                                                                                                                                                                                                                                                                                                                                                                                                                                                                                                                                                                                                                                              | <b>85</b>    |

Search date: 20<sup>th</sup> May 2022

\*Please be aware that the authors used the "study design" category to create search terms for the literature focusing on evaluating decisions by HTAs/NITAGs. However, we are aware that these are not the actual study designs of the records we are hoping to identify.

Table S4: Embase® search terms

| Search No. | Query                                                                                                                                                                                                                                                                                                                                                                                                                                                                                                                                                                                                                                                                                                                                                                                                                                                                                                                                                                                                                                                                                                                                                                                                                                                                                                                                                                                                                                                                                                                                                                                                                                                                                                                                                                                         | Hits    |
|------------|-----------------------------------------------------------------------------------------------------------------------------------------------------------------------------------------------------------------------------------------------------------------------------------------------------------------------------------------------------------------------------------------------------------------------------------------------------------------------------------------------------------------------------------------------------------------------------------------------------------------------------------------------------------------------------------------------------------------------------------------------------------------------------------------------------------------------------------------------------------------------------------------------------------------------------------------------------------------------------------------------------------------------------------------------------------------------------------------------------------------------------------------------------------------------------------------------------------------------------------------------------------------------------------------------------------------------------------------------------------------------------------------------------------------------------------------------------------------------------------------------------------------------------------------------------------------------------------------------------------------------------------------------------------------------------------------------------------------------------------------------------------------------------------------------|---------|
| #1         | austria':ab,ti,kw OR 'austrian':ab,ti,kw OR 'belgium':ab,ti,kw OR 'belgian':ab,ti,kw OR 'bulgaria':ab,ti,kw OR 'bulgars':ab,ti,kw OR 'bulgarian':ab,ti,kw OR 'croatia':ab,ti,kw OR 'croats':ab,ti,kw OR 'croatians':ab,ti,kw OR 'cyprus':ab,ti,kw OR 'cypriot':ab,ti,kw OR 'czech republic':ab,ti,kw OR 'czechs':ab,ti,kw OR 'denmark':ab,ti,kw OR 'danish':ab,ti,kw OR 'danes':ab,ti,kw OR 'estonia':ab,ti,kw OR 'estonian':ab,ti,kw OR 'finland':ab,ti,kw OR 'finns':ab,ti,kw OR 'finnish':ab,ti,kw OR 'france':ab,ti,kw OR 'french':ab,ti,kw OR 'germany':ab,ti,kw OR 'germans':ab,ti,kw OR 'greece':ab,ti,kw OR 'greek':ab,ti,kw OR 'hungary':ab,ti,kw OR 'hungarian':ab,ti,kw OR 'magyar':ab,ti,kw OR 'iceland':ab,ti,kw OR 'icelander':ab,ti,kw OR 'icelandic':ab,ti,kw OR 'ireland':ab,ti,kw OR 'irish':ab,ti,kw OR 'italy':ab,ti,kw OR 'italian':ab,ti,kw OR 'latvia':ab,ti,kw OR 'letts':ab,ti,kw OR 'latvian':ab,ti,kw OR 'lithuania':ab,ti,kw OR 'lithuanian':ab,ti,kw OR 'luxembourg':ab,ti,kw OR 'luxembourgish':ab,ti,kw OR 'netherlands':ab,ti,kw OR 'dutch':ab,ti,kw OR 'niederlander':ab,ti,kw OR 'norway':ab,ti,kw OR 'norwegian':ab,ti,kw OR 'poland':ab,ti,kw OR 'polish':ab,ti,kw OR 'poles':ab,ti,kw OR 'portugal':ab,ti,kw OR 'portuguese':ab,ti,kw OR 'malta':ab,ti,kw OR 'maltese':ab,ti,kw OR 'romania':ab,ti,kw OR 'romanians':ab,ti,kw OR 'slovakia':ab,ti,kw OR 'slovak':ab,ti,kw OR 'slovenia':ab,ti,kw OR 'slovenian':ab,ti,kw OR 'slovenes':ab,ti,kw OR 'spain':ab,ti,kw OR 'spanish':ab,ti,kw OR 'sweden':ab,ti,kw OR 'swedish':ab,ti,kw OR 'switzerland':ab,ti,kw OR 'swiss':ab,ti,kw OR 'united kingdom':ab,ti,kw OR 'uk':ab,ti,kw OR 'british':ab,ti,kw OR 'europe'/exp OR 'europa':ab,ti,kw OR 'european':ab,ti,kw OR 'europe':ab,ti,kw OR 'eu':ab,ti,kw | 309556  |
| #2         | 'pneumococcus vaccine'/exp OR pcv:ab,ti,kw OR 'pneumococcal conjugate vaccine':ab,ti,kw OR (('pneumococcal vaccines'/exp OR ('pneumococcal' AND 'vaccines':ab,ti,kw) OR 'pneumococcal vaccines':ab,ti,kw OR 'pneumococcal':ab,ti,kw) AND 'vaccines, conjugate'/exp)                                                                                                                                                                                                                                                                                                                                                                                                                                                                                                                                                                                                                                                                                                                                                                                                                                                                                                                                                                                                                                                                                                                                                                                                                                                                                                                                                                                                                                                                                                                           | 30587   |
| #3         | 'health technology assessment':ab,ti,kw OR hta:ab,ti,kw OR 'cost-effective':ab,ti,kw OR 'health economic':ab,ti,kw OR 'recommendation':ab,ti,kw OR nitag:ab,ti,kw OR 'national immunization technical advisory groups':ab,ti,kw OR 'national immunisation technical advisory groups':ab,ti,kw                                                                                                                                                                                                                                                                                                                                                                                                                                                                                                                                                                                                                                                                                                                                                                                                                                                                                                                                                                                                                                                                                                                                                                                                                                                                                                                                                                                                                                                                                                 | 245001  |
| #4         | 'incidence'/exp OR 'prevalence'/exp OR inciden*:ab,ti,kw OR prevalen*:ab,ti,kw OR mortality:ab,ti,kw OR casualit*:ab,ti,kw OR death:ab,ti,kw OR deaths:ab,ti,kw OR died:ab,ti,kw OR 'new cases':ab,ti,kw                                                                                                                                                                                                                                                                                                                                                                                                                                                                                                                                                                                                                                                                                                                                                                                                                                                                                                                                                                                                                                                                                                                                                                                                                                                                                                                                                                                                                                                                                                                                                                                      | 5006192 |
| #5         | 'cost of illness':ab,ti,kw OR 'costs and cost analysis'/exp OR 'cost analysis':ab,ti,kw OR 'economic burden':ab,ti,kw OR 'burden of disease':ab,ti,kw OR 'health resources'/exp OR 'health resources':ab,ti,kw OR 'resource use':ab,ti,kw OR 'burden':ab,ti,kw OR 'healthcare resource utilization':ab,ti,kw OR 'expenditure':ab,ti,kw OR 'indirect cost':ab,ti,kw OR 'healthcare cost':ab,ti,kw OR 'hospital cost':ab,ti,kw OR 'hospital costs':ab,ti,kw OR 'in-patient':ab,ti,kw OR 'inpatient':ab,ti,kw OR 'out-patient':ab,ti,kw OR 'outpatient':ab,ti,kw OR 'quality of life'/exp OR 'quality of life':ab,ti,kw OR (('health-related':ab,ti,kw OR 'health related':ab,ti,kw) AND 'quality':ab,ti,kw AND 'life':ab,ti,kw) OR 'health-related quality of life':ab,ti,kw OR 'health related quality of life':ab,ti,kw OR 'hrqol':ab,ti,kw OR 'patient-reported outcomes':ab,ti,kw OR 'eq-5d':ab,ti,kw OR 'sf-36':ab,ti,kw                                                                                                                                                                                                                                                                                                                                                                                                                                                                                                                                                                                                                                                                                                                                                                                                                                                                   | 2009050 |
| #6         | ('vaccination coverage'/exp OR ('vaccination':ab,ti,kw AND 'coverage':ab,ti,kw) OR 'vaccination coverage':ab,ti,kw) AND 'rate':ab,ti,kw OR (('vaccination'/exp OR 'vaccination':ab,ti,kw OR 'vaccinable':ab,ti,kw OR 'vaccinal':ab,ti,kw OR 'vaccinate':ab,ti,kw OR 'vaccinated':ab,ti,kw OR 'vaccinates':ab,ti,kw OR 'vaccinating':ab,ti,kw OR 'vaccinations':ab,ti,kw OR 'vaccination s':ab,ti,kw OR 'vaccinator':ab,ti,kw OR 'vaccinators':ab,ti,kw OR 'vaccine s':ab,ti,kw OR 'vaccined':ab,ti,kw OR 'vaccines'/exp OR 'vaccines':ab,ti,kw OR 'vaccine':ab,ti,kw OR 'vaccins':ab,ti,kw) AND 'rate':ab,ti,kw) OR ('vaccin*':ab,ti,kw AND ('rate':ab,ti,kw                                                                                                                                                                                                                                                                                                                                                                                                                                                                                                                                                                                                                                                                                                                                                                                                                                                                                                                                                                                                                                                                                                                                  | 74871   |

|     |                                                                                                                                                     |      |
|-----|-----------------------------------------------------------------------------------------------------------------------------------------------------|------|
|     | OR 'coverage':ab,ti,kw OR 'coverages':ab,ti,kw OR 'frequency':ab,ti,kw OR 'frequence':ab,ti,kw OR 'frequences':ab,ti,kw OR 'frequencies':ab,ti,kw)) |      |
| #8  | #1 AND #2 AND #3                                                                                                                                    | 284  |
| #11 | #1 AND #2 AND #6                                                                                                                                    | 1280 |
| #14 | #8 OR #11                                                                                                                                           | 1470 |
| #15 | (#8 OR #11) AND [2017-2022]/py                                                                                                                      | 496  |
| #16 | (#8 OR #11) AND ([adult]/lim OR [young adult]/lim OR [middle aged]/lim OR [aged]/lim OR [very elderly]/lim) AND [2017-2022]/py                      | 236  |



Table S5: Included records with recommendation information, by country (n=42)

| Country            | Issuing body/Author             | Title                                                                                                                                        | Year | Position taken | PCV                                                                       |
|--------------------|---------------------------------|----------------------------------------------------------------------------------------------------------------------------------------------|------|----------------|---------------------------------------------------------------------------|
| Belgium            | Superior Health Council (65)    | Avis 9674-Vaccination against pneumococcal disease (adults)                                                                                  | 2022 | Positive       | PCV13, PCV15 or PCV20 followed by PPV23                                   |
|                    | De Burghgraeve et al. 2021 (66) | The incidence of lower respiratory tract infections and pneumococcal vaccination status in adults in Flemish primary care                    | 2021 | Positive       | PCV13 followed by PPV23 (sequential vaccination)                          |
| Denmark            | SST (67)                        | Offer of pneumococcal vaccination for special risk groups                                                                                    | 2020 | Positive       | PPV23 (free vaccination)<br>PCV13 (provided subsidy)<br>followed by PPV23 |
|                    | SSI (68)                        | Pneumococcal vaccine 23-valent (Pneumowax) - Inactivated vaccine against serious pneumococcal infections in children over 2 years and adults | 2022 | Positive       | PPV23 (free)<br>PCV13, PCV20 (subsidized in risk group)                   |
|                    | SST (69)                        | Subsidies for vaccines for certain groups of people                                                                                          | 2022 | Positive       | PPV23                                                                     |
| Estonia            | RATERA (70)                     | Vaccination of adults: Immunodeficient people can be vaccinated with inactivated vaccines                                                    | N/A  | Positive       | PCV13, PPV23                                                              |
| European countries | Esposito et al. 2018 (71)       | The public health value of vaccination for seniors in Europe                                                                                 | 2018 | Positive       | PCV13 followed by PPV23 (sequential vaccination)<br>PCV13<br>PPV23        |
|                    | Bhavsar et al. 2019 (72)        | PIN33 Cost-effectiveness of current pneumococcal vaccines in older adults in European settings: a systematic literature review               | 2019 | Positive       | NR                                                                        |
| Finland            | THL – (KRAR) (73)               | Pneumococcal vaccination strategy                                                                                                            | 2018 | Positive       | PCV13 followed by PPV23 (sequential vaccination)                          |
|                    | THL – (KRAR) (74)               | Pneumococcal vaccinations for at-risk groups                                                                                                 | 2022 | Positive       | PCV13 followed by PPV23 (sequential vaccination)                          |
| France             | HCSP (75)                       | Pneumococcal infections: vaccination recommendations for adults                                                                              | 2017 | Positive       | PCV13 followed by PPV23 (sequential vaccination)                          |
|                    | HAS (76)                        | Vaccination against pneumococcal infections in the context of a shortage of 23-valent unconjugated pneumococcal vaccine                      | 2017 | Positive       | PCV13 followed by PPV23 (sequential vaccination)                          |

| Country | Issuing body/Author               | Title                                                                                                                   | Year | Position taken | PCV                                                                |
|---------|-----------------------------------|-------------------------------------------------------------------------------------------------------------------------|------|----------------|--------------------------------------------------------------------|
|         | Wyplosz et al. 2022 (77)          | Pneumococcal and influenza vaccination coverage among at-risk adults: A 5-year French national observational study      | 2022 | Positive       | PCV13 followed by PPV23 (sequential vaccination)<br>PCV13<br>PPV23 |
|         | Kopp et al. 2021 (78)             | Pneumococcal vaccination coverage in France by general practitioners in adults with a high risk of pneumococcal disease | 2021 | Positive       | PCV13 followed by PPV23 (sequential vaccination)<br>PCV13<br>PPV23 |
| Germany | Kuchenbecker et al. (79)          | Estimating the cost-effectiveness of a sequential pneumococcal vaccination program for adults in Germany                | 2018 | Positive       | PCV13 followed by PPV23 (sequential vaccination)                   |
|         | Paparoupa 2017 (80)               | Pneumococcal vaccination in adults                                                                                      | 2017 | Positive       | PCV13 followed by PPV23 (sequential vaccination)<br>PCV13<br>PPV23 |
|         | Mohr et al. 2021 (81)             | Adherence to STIKO recommendations in patients with pulmonary disease in southeast Germany                              | 2021 | Positive       | PPV23<br>PCV13 followed by PPV23                                   |
| Greece  | Papagiannis et al. 2020 (82)      | Vaccination Coverage of the Elderly in Greece: A Cross-Sectional Nationwide Study                                       | 2020 | Positive       | PCV10, PCV13, PPV23                                                |
| Hungary | VACSATC (83)                      | Vaccinations recommended for adults                                                                                     | 2017 | Positive       | PCV13 followed by PPV23 (sequential vaccination)                   |
| Iceland | Directorate of Health (84)        | Pneumococcal infection, invasive                                                                                        | 2019 | Positive       | PPV23                                                              |
| Ireland | National Immunisation Office (85) | Pneumococcal Infection                                                                                                  | 2018 | Positive       | PPV23<br>PCV10+PPV23 or<br>PCV13+PPV23                             |
| Italy   | ISS (86)                          | Contraindications Guide to vaccinations (update 2018)                                                                   | 2018 | Positive       | PCV13 followed by PPV23 (sequential vaccination)                   |
|         | AIFA (87)                         | The use of Medicines in Italy National Report Year 2020                                                                 | 2020 | Positive       | PCV13 followed by PPV23 (sequential vaccination)                   |
|         | Guerrini et al. 2020 (88)         | Italian recommendations for influenza and pneumococcal vaccination in adult patients with autoimmune rheumatic diseases | 2020 | Positive       | PCV13 followed by PPV23 (sequential vaccination)                   |

| Country     | Issuing body/Author        | Title                                                                                                                                                                                                                  | Year | Position taken  | PCV                                              |
|-------------|----------------------------|------------------------------------------------------------------------------------------------------------------------------------------------------------------------------------------------------------------------|------|-----------------|--------------------------------------------------|
| Lithuania   | ULAC (89)                  | The number of people vaccinated against pneumococcal infection has increased                                                                                                                                           | 2021 | Positive        | PCV13                                            |
| Luxemburg   | CSMI (90)                  | Invasive pneumococcal infections                                                                                                                                                                                       | 2022 | Positive        | PCV13 followed by PPV23 (sequential vaccination) |
| Netherlands | RIVM (91)                  | Pneumococcal Vaccination - Factsheet                                                                                                                                                                                   | 2022 | Positive        | PPV23                                            |
|             | Zorginstituut (92)         | Vaccination of pneumococci over 60s is financed outside the Health Insurance Act                                                                                                                                       | 2018 | Positive        | PPV23                                            |
|             | Zorginstituut (93)         | Report of the Scientific Advisory Board (WAR) meeting on 13-valent pneumococcal polysaccharide conjugate vaccine (Prevenar®)                                                                                           | 2021 | Positive        | PCV13                                            |
|             | RIVM (94)                  | Pneumococcal Disease Guideline                                                                                                                                                                                         | 2022 | Positive        | PPV23                                            |
|             | RIVM (95)                  | Monitor vaccination coverage national program pneumococcal vaccination adults (NPPV) 2020                                                                                                                              | 2020 | Positive        | PPV23                                            |
| Norway      | Folkehelseinstituttet (96) | Pneumococcal vaccine for risk groups                                                                                                                                                                                   | 2020 | Positive        | PPV23                                            |
| Poland      | AOTMiT (97)                | Protocol No. 15/2022 from the Transparency Council meeting on April 19, 2022 in the form of a videoconference                                                                                                          | 2022 | Positive        | PCV13 followed by PPV23 (sequential vaccination) |
|             | AOTMiT (98)                | President's opinion Agency for Health Technology Assessment and Tariff System No. 25/2021 of April 30, 2021 about the draft health policy program "Infection prevention program pneumococcal disease in people over 65 | 2021 | Positive        | NR                                               |
| Portugal    | DGS (99)                   | National program of vaccination                                                                                                                                                                                        | 2022 | Positive        | PPV23                                            |
| Romania     | INSP (100)                 | National VACCINATION Awareness Month April 2022                                                                                                                                                                        | 2022 | Discussion only | PPV23                                            |
| Slovakia    | Ministry of Health (101)   | Pharmaco-economic analysis of the drug (for the purpose of drug categorization)                                                                                                                                        | 2017 | Positive        | PCV13                                            |
| Slovenia    | PSC (102)                  | Summary of the main characteristics of the medicinal product                                                                                                                                                           | 2021 | Positive        | NR                                               |

| Country                                                                                                                                                                                                                                                                                                                                                                                                                                                                                                                                                                                                                                                                                                                                                                                                                                                                                                                                                                                                                                                                                                                                                                                                                                                                                           | Issuing body/Author | Title                                                                                                                             | Year | Position taken  | PCV                                              |
|---------------------------------------------------------------------------------------------------------------------------------------------------------------------------------------------------------------------------------------------------------------------------------------------------------------------------------------------------------------------------------------------------------------------------------------------------------------------------------------------------------------------------------------------------------------------------------------------------------------------------------------------------------------------------------------------------------------------------------------------------------------------------------------------------------------------------------------------------------------------------------------------------------------------------------------------------------------------------------------------------------------------------------------------------------------------------------------------------------------------------------------------------------------------------------------------------------------------------------------------------------------------------------------------------|---------------------|-----------------------------------------------------------------------------------------------------------------------------------|------|-----------------|--------------------------------------------------|
|                                                                                                                                                                                                                                                                                                                                                                                                                                                                                                                                                                                                                                                                                                                                                                                                                                                                                                                                                                                                                                                                                                                                                                                                                                                                                                   | PSC (103)           | Vaccination recommendations adults and children aged 5 years and over against pneumococcal infections                             | 2019 | Positive        | PCV13 followed by PPV23 (sequential vaccination) |
| Spain                                                                                                                                                                                                                                                                                                                                                                                                                                                                                                                                                                                                                                                                                                                                                                                                                                                                                                                                                                                                                                                                                                                                                                                                                                                                                             | AEMPS (104)         | Inter-territorial council of the national Health system specific vaccination in adult people (≥18 years old) with risk conditions | 2022 | Positive        | PCV13 followed by PPV23 (sequential vaccination) |
| Switzerland                                                                                                                                                                                                                                                                                                                                                                                                                                                                                                                                                                                                                                                                                                                                                                                                                                                                                                                                                                                                                                                                                                                                                                                                                                                                                       | CFV (105)           | Federal Commission for Vaccination Issues                                                                                         | 2022 | Positive        | PCV13                                            |
| United Kingdom                                                                                                                                                                                                                                                                                                                                                                                                                                                                                                                                                                                                                                                                                                                                                                                                                                                                                                                                                                                                                                                                                                                                                                                                                                                                                    | JCVI (106)          | Minute of the JCVI Pneumococcal Sub-Committee meeting                                                                             | 2022 | Discussion only | PCV13, PCV15, PCV20, PPV23                       |
| <p><b>Key:</b> AEMPS=Agencia Española de Medicamentos y Productos Sanitarios; AIFA=Agenzia Italiana del Farmacot; AOTMiT=AGENCJA OCENY TECHNOLOGII MEDYCZYCH I TARYFIKACJI; BIM=Budget Impact Analysis; CSMI=Conseil Supérieur des Maladies Infectieuses; DGS=Direção-Geral da Saúde; EKIF=Eidgenössische Kommission für Impffragen; FHI=Folkehelseinstituttet; HAS=Haute Autorité de Santé; HCSP=Haut Conseil de la santé publique; INSP=INSTITUTUL NAȚIONAL DE SĂNĂTATE PUBLICĂ; ISS=ISTITUTO SUPERIORE DI SANITÀ; JCVI=Joint Committee on Vaccination and Immunisation; N/A=Not available; NIJZ=Nacionalni inštitut za javno zdravje; NPPV=Nationaal Programma Pneumokokkenvaccinatie Volwassenen; PCV=Pneumococcal Conjugate Vaccines; PCV7=7-valent Pneumococcal Conjugate Vaccine; PCV13=13-valent Pneumococcal Conjugate Vaccine; PCV15=15-valent Pneumococcal Conjugate Vaccine; PCV20=20-valent Pneumococcal Conjugate Vaccine; PPV23=23-valent Pneumococcal Polysaccharide Vaccine, PSC= POVZETEK GLAVNIH ZNAČILNOSTI ZDRAVILA, RIVM=Rijksinstituut voor Volksgezondheid en Milieu; SSI=Statens Serum Institut; SST=Sundhedsstyrelsen; STIKO=Ständige Impfkommission; THL=Terveyden ja hyvinvoinnin laitos; ULAC=Užkrečiamųjų ligų ir AIDS centro; WAR=Wetenschappelijke Adviesraad</p> |                     |                                                                                                                                   |      |                 |                                                  |

Table S6: Records describing changes to pneumococcal NIP recommendations

| Author (Ref.)                | Country | Pub. year | Available information for the current/original NIP                                                                                                                                                                                                                                                                                                                                                                                                           | Recommendation and rationale                                                                                                                                                                                                                                                                                                                                                                                                                                                                                                                                                                                                                                                                                                                                                                                                                                                                      |
|------------------------------|---------|-----------|--------------------------------------------------------------------------------------------------------------------------------------------------------------------------------------------------------------------------------------------------------------------------------------------------------------------------------------------------------------------------------------------------------------------------------------------------------------|---------------------------------------------------------------------------------------------------------------------------------------------------------------------------------------------------------------------------------------------------------------------------------------------------------------------------------------------------------------------------------------------------------------------------------------------------------------------------------------------------------------------------------------------------------------------------------------------------------------------------------------------------------------------------------------------------------------------------------------------------------------------------------------------------------------------------------------------------------------------------------------------------|
| Superior Health Council (65) | Belgium | 2022      | Original recommendation (CSS 9562): For adults 50 to 85 years of age with comorbidity, revaccination with PPV23 is now recommended 5 years after the primary vaccination using PCV13 followed by PPV23 after a minimum of 8 weeks. A vaccination repeated every 5 years by the PPV23 is recommended in the event of serious underlying comorbidity. In healthy adults aged 65-85 years, the preferential pattern is vaccination with PCV13 followed by PPV23 | Update to the existing NIP, to recommend PCV20, with PCV15 + PPV23 as an alternative schedule. It included recommendations for adults at increased risk of pneumococcal infection (e.g., immunocompromised, or adults with anatomical and/or functional asplenia, sickle cell disease or hemoglobinopathy etc.), and for adults with comorbidities.<br>Rationale: The opinion is based on a review of the scientific literature, published both in scientific journals and reports of national and international organizations competent in the field (peer-reviewed), as well as on the opinion of experts.                                                                                                                                                                                                                                                                                      |
| Danish health authority (67) | Denmark | 2020      | These groups of people who are at increased risk of developing severe pneumococcal disease (residents of care homes, people who have reached the age of 65 with a chronic illness, as well as people under 65 with a particularly high risk of serious pneumococcal disease (e.g., people without a spleen) did not previously receive free vaccination                                                                                                      | Free vaccination with PPV23 was recommended for groups of people who are at increased risk of developing severe pneumococcal disease (residents of care homes, people who have reached the age of 65 with a chronic illness, as well as people under 65 with a particularly high risk of serious pneumococcal disease (e.g., people without a spleen). The Ministry of Health and the Elderly also stated that the recommendation is expected to extend to include other groups (people over 65 who do not belong to a risk group, as well as other groups of people under 65 with an increased risk of IPD) from autumn 2020.<br>Rationale: The offer is intended to help reduce the number of patients affected by serious and treatment-demanding infectious diseases, as well as prevent the healthcare system from being overburdened during the outbreak of the new coronavirus in Denmark. |
| HCSP (75)                    | France  | 2017      | In 2013, pneumococcal vaccine obtained its marketing authorization (AMM) in adults at very high risk or over the age of 50 years and in children from 2 to 17 years old. Recommendations on pneumococcal vaccination of adults have been revised in 2017.                                                                                                                                                                                                    | Recommendations on pneumococcal vaccination of adults have been revised. Two vaccines are available: <ul style="list-style-type: none"> <li>• Primary vaccination with a dose of VPC 13, followed by a dose of PPV23 with a minimum delay of eight weeks.</li> <li>• People who have previously received only the VPP23 vaccine will be able to receive an injection of PCV13 (at least one year after the VPP23).</li> <li>• Another injection of VPP23 may be performed within five years of the first injection of VPP23.</li> </ul>                                                                                                                                                                                                                                                                                                                                                           |

| Author (Ref.)                    | Country     | Pub. year | Available information for the current/original NIP                                                                                                                                                                                                                                                                                                                                                                                                                                                                                                                                                  | Recommendation and rationale                                                                                                                                                                                                                                                                                                                                                                                                                                                                                                                                                                                                                                                                                                                     |
|----------------------------------|-------------|-----------|-----------------------------------------------------------------------------------------------------------------------------------------------------------------------------------------------------------------------------------------------------------------------------------------------------------------------------------------------------------------------------------------------------------------------------------------------------------------------------------------------------------------------------------------------------------------------------------------------------|--------------------------------------------------------------------------------------------------------------------------------------------------------------------------------------------------------------------------------------------------------------------------------------------------------------------------------------------------------------------------------------------------------------------------------------------------------------------------------------------------------------------------------------------------------------------------------------------------------------------------------------------------------------------------------------------------------------------------------------------------|
|                                  |             |           |                                                                                                                                                                                                                                                                                                                                                                                                                                                                                                                                                                                                     | <p>Rationale: The HCSP took into account PCV13 efficacy data on pneumococcal pneumonia (Capita study), recent literature, international recommendations and relied on medico-economic modeling which assessed different vaccination scenarios for population according to their age or risk factors.</p> <p>With the aim of obtaining a reduction in the frequency of pneumonia and invasive pneumococcal infections, and in line with previous recommendations, the High Council for Public Health extends to adults of all ages at high risk of invasive infections and non-immunocompromised pneumonia.</p>                                                                                                                                   |
| Paparoupa et al (80)             | Germany     | 2017      | These STIKO recommendations contradict those of the updated S3 guideline for the treatment and prevention of community-acquired pneumonia and the internationally defined vaccination recommendations                                                                                                                                                                                                                                                                                                                                                                                               | <p>In order to achieve the best possible protection, the STIKO recommends sequential vaccination with the 13-valent pneumococcal conjugate vaccine (PCV13) followed by vaccination with PPV23 in 6 to 12 months. Vaccination with PPV23 alone is recommended for patients with other chronic diseases and seniors over the age of 60, which must be repeated at least every 6 years due to the lack of immunity.”</p> <p>Rationale: “Due to the observation that the PCV13 vaccine has better immunogenicity in immunocompromised patients, the recommendation of sequential vaccination in the most vulnerable risk groups (adults with immunosuppression or immunodeficiencies, adults at risk of pneumococcal meningitis) was formulated.</p> |
| Kuchenbecker et al (79)          | Germany     | 2018      | “PPV23 is recommended for all elderly (60+) and all patients 16+ with at least one chronic disease not associated with immune suppression. For all other patients at risk (high-risk representing (congenital or acquired) immunocompromised/ immunosuppressed patients, with or without chronic medical conditions), sequential immunization with PCV13 first is recommended, followed by PPV23. Repeated vaccination with PPV23 is recommended for patients in all risk groups. Elderly are recommended revaccination every 6 years with PPV23 following individual assessment by the physician.” | <p>“Our study indicates that a sequential vaccination strategy independent of underlying risks might be optimal in minimizing the burden of pneumococcal disease.”</p> <p>Rationale: “Our model disclosed that within each scenario every case avoided, has its own price. However, in more than two-third of the hypothetical scenarios the ICERs were below the present maximum WTP of €50,000. Although there is no clear-cut margin in the German health care system, a cost-effectiveness threshold of \$50,000 for a life year or QALY gained is assumed internationally. With respect to our study, results seem well below the boundaries of societies’ and payers’ WTP “</p>                                                            |
| Netherlands institute for Health | Netherlands | 2020      | It was previously recommended to receive a combination of PCV+PPV23                                                                                                                                                                                                                                                                                                                                                                                                                                                                                                                                 | In 2018, the Health Council recommended that elderly people aged 60 and over be vaccinated with the vaccine PPV23. This vaccination should be repeated every 5 years until the age of 75 years. On 24 June 2019,                                                                                                                                                                                                                                                                                                                                                                                                                                                                                                                                 |

| Author (Ref.)                                         | Country  | Pub. year | Available information for the current/original NIP                                                                                                                                                                                                                                                  | Recommendation and rationale                                                                                                                                                                                                                                                                                                                                                                                                                                                                                                                                                                                                                                                                                                                                                                                                                                                                                                                               |
|-------------------------------------------------------|----------|-----------|-----------------------------------------------------------------------------------------------------------------------------------------------------------------------------------------------------------------------------------------------------------------------------------------------------|------------------------------------------------------------------------------------------------------------------------------------------------------------------------------------------------------------------------------------------------------------------------------------------------------------------------------------------------------------------------------------------------------------------------------------------------------------------------------------------------------------------------------------------------------------------------------------------------------------------------------------------------------------------------------------------------------------------------------------------------------------------------------------------------------------------------------------------------------------------------------------------------------------------------------------------------------------|
| Services research (95)                                |          |           |                                                                                                                                                                                                                                                                                                     | the State Secretary for Health, Welfare and Sport decided to adopt the Health Council's advice, and the House of Representatives were informed that from autumn 2020 all adults aged 60, 65, 70 and 75 will receive an invitation from their GP for a pneumococcal vaccination once every 5 years.                                                                                                                                                                                                                                                                                                                                                                                                                                                                                                                                                                                                                                                         |
| Directorate-General for Health (99)                   | Portugal | 2022      | Vaccination against <i>S. Pneumoniae</i> infections for adults belonging to a risk group started in 2015.                                                                                                                                                                                           | The present update of Standard 011/2015 aims to expand the risk groups for which vaccination is recommended and the risk groups for which vaccination is free. The main updates included PPV23 for all adults aged 65 and over against <i>S. pneumoniae</i> infections. Also, free vaccination was provided to selected risk groups including people with chronic respiratory failure, and transplant candidates                                                                                                                                                                                                                                                                                                                                                                                                                                                                                                                                           |
| Joint Committee on Vaccination and Immunization (106) | UK       | 2022      | <p>“The committee previously did not advise PCV13 in the adult program because modelling showed indirect protection from the childhood program.”</p> <p>“Members commented that the current adult vaccination program may not be optimal, in terms of the schedule and the vaccine being used.”</p> | <p>Rationale: “It was noted that if PPV23 was simply replaced with a higher valency PCV, this would only be offered at 65 years of age which was not the same as vaccinating everyone over age 65 with the higher valency PCV. To see the impact on elderly disease all age groups over 65 would need to be vaccinated.”</p> <p>“The use of PPV23 alongside a PCV was suggested. It was noted that it was not straightforward to compare the impact of PCV13 and PPV23. PCV13 may have high efficacy but only for 13 serotypes, whereas PPV23 may have lower efficacy but it covers more serotypes. Higher valency PCVs would make a better comparison to PPV23 and may make a bigger difference for CAP.</p> <p>The committee agreed that it would be useful to have a model on the impact of PCV15/20 introduction in the next two years. The model could assist in answering whether a catch-up program was needed and what the schedule should be”</p> |

Abbreviation: CAP = community-acquired pneumonia; IPD = invasive pneumococcal disease; GP = general practitioner; NIP = national immunization policy; Pub. = publication; STIKO=Ständige Impfkommission (standing committee on vaccination)

Table S7: Epidemiological evidence: Summary of evidence in detail based on the type of outcome (n=22)

|         |                              |                                                                                                                                  |                           | Outcome Type                                                                                                                                                                                                                                                                                                                   |                                                                                                     |
|---------|------------------------------|----------------------------------------------------------------------------------------------------------------------------------|---------------------------|--------------------------------------------------------------------------------------------------------------------------------------------------------------------------------------------------------------------------------------------------------------------------------------------------------------------------------|-----------------------------------------------------------------------------------------------------|
|         |                              |                                                                                                                                  |                           | Incidence/Prevalence                                                                                                                                                                                                                                                                                                           |                                                                                                     |
| Country | Author                       | Title (Publication year)                                                                                                         | Type of vaccine           | IPD                                                                                                                                                                                                                                                                                                                            | Pneumonia                                                                                           |
| Austria | Walter et al. 2019 (107)     | A public health and budget impact analysis (BIA) of vaccinating adults against pneumococcal diseases in Austria (2019)           | PCV13 + PPV23             | <p>Cases based on pneumococcal annual report 2016- 2017</p> <p>18-34 years<br/>Pneumonia: 7<br/>Pneumonia and sepsis: 4</p> <p>35-49 years<br/>Pneumonia: 19<br/>Pneumonia and sepsis: 9</p> <p>50-64 years<br/>Pneumonia: 41<br/>Pneumonia and sepsis: 20</p> <p>≥65 years<br/>Pneumonia: 95<br/>Pneumonia and sepsis: 54</p> |                                                                                                     |
| Belgium | Superior Health Council (65) | Report 9674 - Vaccination against pneumococcal disease (adults)- 2022                                                            | PPV2; PCV13; PCV15; PCV20 |                                                                                                                                                                                                                                                                                                                                | pneumonia with bacteremia<br>≥65 years: 40/100,000                                                  |
|         | De Burghgraeve et al. (66)   | The incidence of lower respiratory tract infections and pneumococcal vaccination status in adults in Flemish primary care (2021) | PCV13 followed by PPV23   |                                                                                                                                                                                                                                                                                                                                | overall incidence rate 5.8/1000py                                                                   |
|         | Marbaix et al. 2018 (108)    | Cost-effectiveness of PCV13 vaccination in Belgian adults aged 65-                                                               | PCV13                     |                                                                                                                                                                                                                                                                                                                                | Pneumococcal CAP<br>Inpatient 65-74 years - 105.9/100,000<br>Outpatient 65-74 years - 73.48/100,000 |



|                    |                           |                                                                                                                                                                    |                 | Outcome Type                                                                                                                                                                                        |                                                                                                                                                                                                                                                                                                                                                                                                                                                                             |
|--------------------|---------------------------|--------------------------------------------------------------------------------------------------------------------------------------------------------------------|-----------------|-----------------------------------------------------------------------------------------------------------------------------------------------------------------------------------------------------|-----------------------------------------------------------------------------------------------------------------------------------------------------------------------------------------------------------------------------------------------------------------------------------------------------------------------------------------------------------------------------------------------------------------------------------------------------------------------------|
|                    |                           |                                                                                                                                                                    |                 | Incidence/Prevalence                                                                                                                                                                                |                                                                                                                                                                                                                                                                                                                                                                                                                                                                             |
| Country            | Author                    | Title (Publication year)                                                                                                                                           | Type of vaccine | IPD                                                                                                                                                                                                 | Pneumonia                                                                                                                                                                                                                                                                                                                                                                                                                                                                   |
|                    |                           | 84 years at elevated risk of pneumococcal infection (2018)                                                                                                         |                 |                                                                                                                                                                                                     | Inpatient 75-84 years - 152.7/100,000<br>Outpatient 75-84 years - 110.21/100,000<br>Inpatient 85+ years - 332.8/100,000<br>Outpatient 85+ years - 164.43/100,000                                                                                                                                                                                                                                                                                                            |
| Denmark            | Birck et al. 2021 (109)   | Health economic evaluation of introducing a PPV23-based vaccination program to adults aged 65 and above, and an extension to the 60-64 age group in Denmark (2021) | PPV23           | 60-64 years: 39.43/100,000<br>≥65 years: 48/100,000                                                                                                                                                 | Non-bacteremic pneumococcal pneumonia:<br>60-64 years: 485/100,000<br>65-74 years: 1,455/100,000<br>75-84 years: 3,499/100,000<br>≥85 years: 7,438/100,000                                                                                                                                                                                                                                                                                                                  |
| European countries | Esposito et al. 2018 (71) | The public health value of vaccination for seniors in Europe (2018)                                                                                                | Not specified   | ≥65 years: 13.8/100,000                                                                                                                                                                             |                                                                                                                                                                                                                                                                                                                                                                                                                                                                             |
| Finland            | THL (KRAR) (73)           | Pneumococcal vaccination strategy (2018)                                                                                                                           | PCV13 +PPV23    | 2016-2017:<br><br>18-49 years - 6.63/100,000<br>50-64 years - 18.13/100,000<br>65-74 years - 30.38/100,000<br>75-84 years - 38.13/100,000<br>≥65 years - 37.11/100,000<br>≥85 years - 65.48/100,000 | Hospital-treated primary pneumonia:<br>2012-2017: 18-49 years - 1.35/100,000<br>2016-2017: 18-49 years - 1.49/100,000<br><br>2012-2017: 50-64 years - 3.65/100,000<br>2016-2017: 50-64 years - 3.73/100,000<br><br>2012-2017: 65-74 years - 8.91/100,000<br>2016-2017: 65-74 years - 9.1/100,000<br><br>2012-2017: 75-84 years - 22.62/100,000<br>2016-2017: 75-84 years - 22.41/100,000<br><br>2012-2017: ≥85years - 51.12/100,000<br>2016-2017: ≥85 years - 50.67/100,000 |
| France             | HCSP (75)                 | Pneumococcal infections: vaccination                                                                                                                               | PPV23 + PCV13   | <b>Incidence</b><br>2017: adults (≥18 years) - 10/100,000                                                                                                                                           | 2017:<br>bacteraemia in hospitalized adults ≥18 years: 9.1/100,000                                                                                                                                                                                                                                                                                                                                                                                                          |

|         |                                   |                                                                                                                                                                                   |                 | Outcome Type                                                                                                                                     |                                                                                                              |
|---------|-----------------------------------|-----------------------------------------------------------------------------------------------------------------------------------------------------------------------------------|-----------------|--------------------------------------------------------------------------------------------------------------------------------------------------|--------------------------------------------------------------------------------------------------------------|
|         |                                   |                                                                                                                                                                                   |                 | Incidence/Prevalence                                                                                                                             |                                                                                                              |
| Country | Author                            | Title (Publication year)                                                                                                                                                          | Type of vaccine | IPD                                                                                                                                              | Pneumonia                                                                                                    |
|         |                                   | recommendations for adults (2017)                                                                                                                                                 |                 | <b>Prevalence</b><br>2017: baseline risk:<br>≥18 years - 1,866<br>18-49 years - 550<br>50-64 years - 382<br>65-79 years - 386<br>≥80 years - 547 | 18-49 years: 3.2/100,000<br>50-64 years: 8.6/100,000<br>65-79 years: 14.7/100,000<br>≥80 years: 39.1/100,000 |
| Germany | STIKO (79)                        | Estimating the cost-effectiveness of a sequential pneumococcal vaccination program for adults in Germany (2018)                                                                   | PCV13 + PPV23   | 18-49 years<br>Bacteraemia: 2/100,000                                                                                                            | 18-49 years<br>Inpatient: 198/100,000<br>Outpatient: 280/100,000                                             |
|         | Storch et al. 2022 (110)          | The effect of influenza and pneumococcal vaccination in the elderly on health service utilization and costs: a claims data-based cohort study (2022)                              | PCV             |                                                                                                                                                  | 2013:<br>Pneumonia: 2.59% (n=138,877)                                                                        |
| Ireland | National Immunisation Office (85) | Pneumococcal Infection (2018)                                                                                                                                                     | PCV13 + PPV23   | Incidence rates are shown in a graph, no actual numbers reported                                                                                 |                                                                                                              |
| Italy   | Boccalini et al. 2017 (111)       | Economic studies applied to vaccines against invasive diseases: An updated budget impact analysis of age-based pneumococcal vaccination strategies in the elderly in Italy (2017) | PCV13           |                                                                                                                                                  | CAP<br>>64 years: 3.34/1,000                                                                                 |
|         | Sanduzzi et al. 2019 (112)        | Impact of 13valent vaccine for prevention of                                                                                                                                      | PCV13           |                                                                                                                                                  | CAP incidence: 3.34%                                                                                         |

|             |                           |                                                                                                                                                                                                       |                 | Outcome Type                                                                                                                                                                                    |                                                                                                                                                                                                                                                                                                                                                                                               |
|-------------|---------------------------|-------------------------------------------------------------------------------------------------------------------------------------------------------------------------------------------------------|-----------------|-------------------------------------------------------------------------------------------------------------------------------------------------------------------------------------------------|-----------------------------------------------------------------------------------------------------------------------------------------------------------------------------------------------------------------------------------------------------------------------------------------------------------------------------------------------------------------------------------------------|
|             |                           |                                                                                                                                                                                                       |                 | Incidence/Prevalence                                                                                                                                                                            |                                                                                                                                                                                                                                                                                                                                                                                               |
| Country     | Author                    | Title (Publication year)                                                                                                                                                                              | Type of vaccine | IPD                                                                                                                                                                                             | Pneumonia                                                                                                                                                                                                                                                                                                                                                                                     |
|             |                           | pneumococcal diseases in children and adults at risk: Possible scenarios in Campania region (2019)                                                                                                    |                 |                                                                                                                                                                                                 |                                                                                                                                                                                                                                                                                                                                                                                               |
| Netherlands | RIVM (91)                 | Pneumococcal Vaccination – Factsheet (2022)                                                                                                                                                           | PPV23           | 2013:<br>All ages - 2152/100,000<br>≥50 years - 1788/100,000                                                                                                                                    |                                                                                                                                                                                                                                                                                                                                                                                               |
|             | Zorginstituut (92)        | Vaccination of pneumococci over 60s is financed outside the Health Insurance Act (2018)                                                                                                               | PPV23           | ≥60 years: 45/100,000                                                                                                                                                                           |                                                                                                                                                                                                                                                                                                                                                                                               |
|             | RIVM (94)                 | Pneumococcal Disease Guideline (2022)                                                                                                                                                                 | PPV23           | 2015-2017: All ages - 14.7/100,000                                                                                                                                                              | It is estimated that there are at least 60,000 to 70,000 cases of non-invasive pneumococcal disease, including pneumonia, in all age groups                                                                                                                                                                                                                                                   |
| Poland      | Wróbel et al. 2017 (113)  | Invasive pneumococcal disease among patients above 65 years old (2017)                                                                                                                                | PCV13 + PPV23   | 2016:<br>≥65 years: 4.76/100,000                                                                                                                                                                |                                                                                                                                                                                                                                                                                                                                                                                               |
| Portugal    | Gouveia et al. 2019 (114) | Cost-effectiveness of the 13-valent pneumococcal conjugate vaccine in adults in Portugal versus "no vaccination" and versus vaccination with the 23-valent pneumococcal polysaccharide vaccine (2019) | PCV13 + PPV23   | Bacteraemia and sepsis<br>Total: 8.86/100,000<br>18-49 years: 3.49/100,000<br>50-64 years: 8.51/100,000<br>65-74 years: 11.07/100,000<br>75-84 years: 21.32/100,000<br>>84 years: 54.47/100,000 | Pneumonia inpatient<br>Total: 467.84/100,000<br>18-49 years: 53.87/100,000<br>50-64 years: 199.68/100,000<br>65-74 years: 548.20/100,000<br>75-84 years: 1,780.73/100,000<br>>84 years: 5,243.96/100,000<br><br>Pneumonia outpatient<br>Total: 838.16/100,000<br>18-49 years: 315.76/100,000<br>50-64 years: 754.21/100,000<br>65-74 years: 1,325.38/100,000<br>75-84 years: 2,449.95/100,000 |

|          |                               |                                                                                                                                                                    |                 | Outcome Type                                                                                                                                         |                                                                                                                                                                                                    |
|----------|-------------------------------|--------------------------------------------------------------------------------------------------------------------------------------------------------------------|-----------------|------------------------------------------------------------------------------------------------------------------------------------------------------|----------------------------------------------------------------------------------------------------------------------------------------------------------------------------------------------------|
|          |                               |                                                                                                                                                                    |                 | Incidence/Prevalence                                                                                                                                 |                                                                                                                                                                                                    |
| Country  | Author                        | Title (Publication year)                                                                                                                                           | Type of vaccine | IPD                                                                                                                                                  | Pneumonia                                                                                                                                                                                          |
|          |                               |                                                                                                                                                                    |                 |                                                                                                                                                      | >84 years: 3,349.64/100,000                                                                                                                                                                        |
| Slovakia | Ministry of Health (101)      | Pharmaco-economic analysis of the drug (for the purpose of drug categorization) 2017                                                                               | PCV13           | Pneumococcal disease:<br>18-34 years: 1.51/100,000<br>35-49 years: 3.92/100,000<br>50-64 years: 8.69/100,000<br>≥65 years: 23.05/100,000             |                                                                                                                                                                                                    |
| Sweden   | Wolff et al. (115)            | Cost-effectiveness of pneumococcal vaccination for elderly in Sweden (2020)                                                                                        | PCV13 + PPV23   | 65-year-olds: 32/100,000<br>75-year-olds: 42/100,000                                                                                                 | CAP (inpatient)<br>65-year-olds: 162/100,000<br>75-year-olds: 397/100,000<br><br>CAP (outpatient)<br>65-year-olds: 315/100,000<br>75-year-olds: 525/100,000                                        |
|          |                               |                                                                                                                                                                    |                 |                                                                                                                                                      | Mortality                                                                                                                                                                                          |
| Denmark  | Birck et al. 2021 (109)       | Health economic evaluation of introducing a PPV23-based vaccination program to adults aged 65 and above, and an extension to the 60-64 age group in Denmark (2021) | PPV23           | No vaccination, 60-64 years: 342<br>No vaccination, ≥65 years: 417<br><br>PPV23 (75% uptake), 60-64 years: 228<br>PPV23 (75% uptake), ≥65 years: 276 | Non-bacteremic pneumococcal pneumonia:<br>No vaccination, 60-64 years: 496<br>No vaccination, ≥65 years: 7,940<br><br>PPV23 (75% uptake), 60-64 years: 425<br>PPV23 (75% uptake), ≥65 years: 6,772 |
| France   | HCSP (75)                     | Pneumococcal infections: vaccination recommendations for adults (2017)                                                                                             | PPV23 + PCV13   | IPD:<br>2017: <65 years - 12.7%<br>2017: ≥65 years - 18.6%                                                                                           | CAP:<br>2017: 18-64 years - 0.2%<br>2017: ≥65 years - 0.7%<br><br>Hospitalized bacteremic pneumonia:<br>2017: 18-64 years - 1.2%<br>2017: ≥65 years - 8.6%                                         |
| Germany  | Kuchenbecker et al. 2018 (79) | Estimating the cost-effectiveness of a                                                                                                                             | PCV13 + PPV23   | 18-49 years<br>Bacteraemia: 20/100                                                                                                                   | Pneumonia inpatient<br>, 18-49 years: 14/100                                                                                                                                                       |

|             |                               |                                                                                                                                                                                                       |                 | Outcome Type                                                                                                                                                                                     |                                                                                                                                                                                                                                                                                                                                                                          |
|-------------|-------------------------------|-------------------------------------------------------------------------------------------------------------------------------------------------------------------------------------------------------|-----------------|--------------------------------------------------------------------------------------------------------------------------------------------------------------------------------------------------|--------------------------------------------------------------------------------------------------------------------------------------------------------------------------------------------------------------------------------------------------------------------------------------------------------------------------------------------------------------------------|
|             |                               |                                                                                                                                                                                                       |                 | Incidence/Prevalence                                                                                                                                                                             |                                                                                                                                                                                                                                                                                                                                                                          |
| Country     | Author                        | Title (Publication year)                                                                                                                                                                              | Type of vaccine | IPD                                                                                                                                                                                              | Pneumonia                                                                                                                                                                                                                                                                                                                                                                |
|             |                               | sequential pneumococcal vaccination program for adults in Germany (2018)                                                                                                                              |                 |                                                                                                                                                                                                  |                                                                                                                                                                                                                                                                                                                                                                          |
| Portugal    | Gouveia et al. 2019 (114)     | Cost-effectiveness of the 13-valent pneumococcal conjugate vaccine in adults in Portugal versus "no vaccination" and versus vaccination with the 23-valent pneumococcal polysaccharide vaccine (2019) | PCV13 + PPV23   | IPD:<br>Bacteraemia and sepsis<br>Total: 4.37%<br>18-49 years: 4.26%<br>50-64 years: 3.80%<br>65-74 years: 2.79%<br>75-84 years: 7.65%<br>>84 years: 7.4%                                        | Pneumonia inpatient<br>Total: 10.54%<br>18-49 years: 5.37%<br>50-64 years: 11.04%<br>65-74 years: 16.81%<br>75-84 years: 22.44%<br>>84 years: 30.82%<br><br>Pneumonia outpatient<br>Total: 838.16/100,000<br>18-49 years: 315.76/100,000<br>50-64 years: 754.21/100,000<br>65-74 years: 1,325.38/100,000<br>75-84 years: 2,449.95/100,000<br>>84 years: 3,349.64/100,000 |
| Slovakia    | Ministry of Health (101)      | Pharmaco-economic analysis of the drug (for the purpose of drug categorization) 2017                                                                                                                  | PCV13           |                                                                                                                                                                                                  | Pneumonia (hospitalized)<br>18-34 years: 1.73%<br>35-49 years: 5.81%<br>50-64 years: 9.88%<br>≥65 years: 20.64%                                                                                                                                                                                                                                                          |
| Netherlands | Thorrington et al. 2018 (116) | Impact and cost-effectiveness of different vaccination strategies to reduce the burden of pneumococcal disease among elderly in the Netherlands (2018)                                                | PCV13 or PPV23  | PCV13 minus PCV10 types<br>60-64 years: 11%<br>65-69 years: 16%<br>70-74 years: 25%<br>75-79 years: 17%<br>≥80 years: 24%<br><br>PPV23 minus PCV13 types<br>60-64 years: 11%<br>65-69 years: 10% | CAP<br>60-69 years: 9.6%<br>70-79 years: 13.9%<br>80-89 years: 19.1%<br>≥90 years: 25.5%                                                                                                                                                                                                                                                                                 |

|         |                              |                                                                                                                        |                            | Outcome Type                                                                                                                                                                                                                                     |           |
|---------|------------------------------|------------------------------------------------------------------------------------------------------------------------|----------------------------|--------------------------------------------------------------------------------------------------------------------------------------------------------------------------------------------------------------------------------------------------|-----------|
|         |                              |                                                                                                                        |                            | Incidence/Prevalence                                                                                                                                                                                                                             |           |
| Country | Author                       | Title (Publication year)                                                                                               | Type of vaccine            | IPD                                                                                                                                                                                                                                              | Pneumonia |
|         |                              |                                                                                                                        |                            | 70-74 years: 10%<br>75-79 years: 13%<br>≥80 years: 22%<br><br>Non vaccine types<br>60-64 years: 12%<br>65-69 years: 22%<br>70-74 years: 22%<br>75-79 years: 13%<br>≥80 years: 19%                                                                |           |
|         | Zorginstituut (92)           | Vaccination of pneumococci over 60s is financed outside the Health Insurance Act (2018)                                | PPV23                      | 17% among ≥60 years                                                                                                                                                                                                                              |           |
|         |                              |                                                                                                                        |                            | <b>Serotype distribution details</b>                                                                                                                                                                                                             |           |
| Austria | Walter et al. 2019 (107)     | A public health and budget impact analysis (BIA) of vaccinating adults against pneumococcal diseases in Austria (2019) | PCV13 + PPV23              | PCV13: 54%<br>PPV23: 76.9%                                                                                                                                                                                                                       |           |
| Belgium | Superior Health Council (65) | Report 9674 - Vaccination against pneumococcal disease (adults)- 2022                                                  | PPV23; PCV13; PCV15; PCV20 | 2021<br>PCV13: 16-49 years - 35.3%<br>PCV13: 50-64 years - 39.1%<br>PCV13: ≥65 years - 31.7%<br>PCV13: ≥16 years - 34.4%<br><br>PPV23: 16-49 years - 78.0%<br>PPV23: 50-64 years - 73.4%<br>PPV23: ≥65 years - 69.1%<br>PPV23: ≥16 years - 72.1% |           |
|         | Willem et al. 2018 (117)     | Economic evaluation of pneumococcal vaccines                                                                           |                            | PCV13: 25.3%<br>PPV23: 66.2%                                                                                                                                                                                                                     |           |

|         |                           |                                                                                                                                                                    |                 | Outcome Type                                                                                                                                                                                                                                                                                                                                         |                                                                                        |
|---------|---------------------------|--------------------------------------------------------------------------------------------------------------------------------------------------------------------|-----------------|------------------------------------------------------------------------------------------------------------------------------------------------------------------------------------------------------------------------------------------------------------------------------------------------------------------------------------------------------|----------------------------------------------------------------------------------------|
|         |                           |                                                                                                                                                                    |                 | Incidence/Prevalence                                                                                                                                                                                                                                                                                                                                 |                                                                                        |
| Country | Author                    | Title (Publication year)                                                                                                                                           | Type of vaccine | IPD                                                                                                                                                                                                                                                                                                                                                  | Pneumonia                                                                              |
|         |                           | for adults aged over 50 years in Belgium (2018)                                                                                                                    |                 |                                                                                                                                                                                                                                                                                                                                                      |                                                                                        |
|         | Marbaix et al. 2018 (108) | Cost-effectiveness of PCV13 vaccination in Belgian adults aged 65-84 years at elevated risk of pneumococcal infection (2018)                                       | PCV13 and PPV23 |                                                                                                                                                                                                                                                                                                                                                      | PCV13: 65-84 years - 58%<br><br>PPV23: 64-74 years - 10%<br>PPV23: 75-84 years - 12.9% |
| Denmark | Birck et al. 2021 (109)   | Health economic evaluation of introducing a PPV23-based vaccination program to adults aged 65 and above, and an extension to the 60-64 age group in Denmark (2021) | PPV23           |                                                                                                                                                                                                                                                                                                                                                      | PCV13: 12.0%<br>PPV23: 73.0%                                                           |
| Finland | THL (KRAR) (73)           | Pneumococcal vaccination strategy (2018)                                                                                                                           | PCV13 +PPV23    | 2016-2017:<br>18-49 years: PCV13-PCV10 (3, 6A, 19A) - 3.18/100,000<br>PCV13: - 4.49/100,000<br>PPV23 - 1.54/100,000<br><br>50-64 years:<br>PCV13-PCV10 (3, 6A, 19A) - 7.44/100,000<br>PCV13- - 10.1/100,000<br>PPV23 - 4.51/100,000<br><br>65-74 years:<br>PCV13-PCV10 (3, 6A, 19A) - 12.9/100,000<br>PCV13- - 16.79/100,000<br>PPV23 - 6.56/100,000 |                                                                                        |

|         |                             |                                                                                                                                                                                   |                 | Outcome Type                                                                                                                                                                                                                                                                                                                          |                                                  |
|---------|-----------------------------|-----------------------------------------------------------------------------------------------------------------------------------------------------------------------------------|-----------------|---------------------------------------------------------------------------------------------------------------------------------------------------------------------------------------------------------------------------------------------------------------------------------------------------------------------------------------|--------------------------------------------------|
|         |                             |                                                                                                                                                                                   |                 | Incidence/Prevalence                                                                                                                                                                                                                                                                                                                  |                                                  |
| Country | Author                      | Title (Publication year)                                                                                                                                                          | Type of vaccine | IPD                                                                                                                                                                                                                                                                                                                                   | Pneumonia                                        |
|         |                             |                                                                                                                                                                                   |                 | 75-84 years:<br>PCV13-PCV10 (3, 6A, 19A) - 15.88/100,000<br>PCV13 - 19.99/100,000<br>PPV23 - 8.36/100,000<br><br>≥65 years:<br>PCV13-PCV10 (3, 6A, 19A) - 15.12/100,000<br>PCV13 - 19.51/100,000<br>PPV23 - 8/100,000<br><br>≥85 years:<br>PCV13-PCV10 (3, 6A, 19A) - 23.46/100,000<br>PCV13 - 30.81/100,000<br>PPV23 - 13.66/100,000 |                                                  |
| France  | HCSP (75)                   | Pneumococcal infections: vaccination recommendations for adults (2017)                                                                                                            | PPV23 + PCV13   | PPV23:<br>expected in 2020: 18-64 years: 15%<br>expected in 2020: >65 years: 13%                                                                                                                                                                                                                                                      |                                                  |
| Italy   | Boccalini et al. 2017 (111) | Economic studies applied to vaccines against invasive diseases: An updated budget impact analysis of age-based pneumococcal vaccination strategies in the elderly in Italy (2017) | PCV13           | PCV13 serotype coverage against IPD: 69.2%                                                                                                                                                                                                                                                                                            | PCV13 serotype coverage against pneumonia: 73.5% |
| Poland  | Wróbel et al. 2017 (113)    | Invasive pneumococcal disease among patients above 65 years old (2017)                                                                                                            | PCV13 + PPV23   | PCV13: 67.0%<br>PPV23: 81.9%                                                                                                                                                                                                                                                                                                          |                                                  |



|                                                                                                                                                                                                                                                                                                                                                                                                                                                                                              |                               |                                                                                                                                                        |                 | Outcome Type                           |                                                                                          |
|----------------------------------------------------------------------------------------------------------------------------------------------------------------------------------------------------------------------------------------------------------------------------------------------------------------------------------------------------------------------------------------------------------------------------------------------------------------------------------------------|-------------------------------|--------------------------------------------------------------------------------------------------------------------------------------------------------|-----------------|----------------------------------------|------------------------------------------------------------------------------------------|
|                                                                                                                                                                                                                                                                                                                                                                                                                                                                                              |                               |                                                                                                                                                        |                 | Incidence/Prevalence                   |                                                                                          |
| Country                                                                                                                                                                                                                                                                                                                                                                                                                                                                                      | Author                        | Title (Publication year)                                                                                                                               | Type of vaccine | IPD                                    | Pneumonia                                                                                |
|                                                                                                                                                                                                                                                                                                                                                                                                                                                                                              |                               |                                                                                                                                                        |                 | % Attributable to <i>S. pneumoniae</i> |                                                                                          |
| Germany                                                                                                                                                                                                                                                                                                                                                                                                                                                                                      | Kuchenbecker et al. 2018 (79) | Estimating the cost-effectiveness of a sequential pneumococcal vaccination program for adults in Germany (2018)                                        | PCV13 + PPV23   |                                        | 29.9% of all-cause nonbacteremic pneumonia in Germany are caused by <i>S. pneumoniae</i> |
| Italy                                                                                                                                                                                                                                                                                                                                                                                                                                                                                        | Sanduzzi et al. 2019 (112)    | Impact of 13valent vaccine for prevention of pneumococcal diseases in children and adults at risk: Possible scenarios in Campania region (2019)        | PCV13           |                                        | 40% of all CAP was caused by <i>S. pneumoniae</i>                                        |
| Netherlands                                                                                                                                                                                                                                                                                                                                                                                                                                                                                  | Thorrington et al. 2018 (116) | Impact and cost-effectiveness of different vaccination strategies to reduce the burden of pneumococcal disease among elderly in the Netherlands (2018) | PCV13 or PPV23  |                                        | 30% of all cause CAP was caused by <i>S. pneumoniae</i>                                  |
| Slovakia                                                                                                                                                                                                                                                                                                                                                                                                                                                                                     | Ministry of Health (101)      | Pharmaco-economic analysis of the drug (for the purpose of drug categorization) 2017                                                                   | PCV13           |                                        | 36% of all cause CAP was caused by <i>S. pneumoniae</i>                                  |
| <p><b>Key:</b> HCSP=Haut Conseil de la santé publique; IPD=Invasive Pneumococcal Disease; PCV=Pneumococcal Conjugate Vaccine; PCV7=7-valent Pneumococcal Conjugate Vaccine; PCV13=13-valent Pneumococcal Conjugate Vaccine; PCV10=10-valent, PPV23= Pneumococcal Conjugate Vaccine; 23-valent Pneumococcal Polysaccharide Vaccine; RIVM=Rijksinstituut voor Volksgezondheid en Milieu; THL (KRAR)=Finnish institute for health and welfare (The National Advisory Committee on Vaccines)</p> |                               |                                                                                                                                                        |                 |                                        |                                                                                          |

Table S8: Summary of health economic evidence (n=22)

| Country | Author - Title (publication year)                                                                                                                   | Summary                                                                                                                                                                                                                                                                                                                                                                                                                                                                                                                                                                                                                                                                                                                                 |
|---------|-----------------------------------------------------------------------------------------------------------------------------------------------------|-----------------------------------------------------------------------------------------------------------------------------------------------------------------------------------------------------------------------------------------------------------------------------------------------------------------------------------------------------------------------------------------------------------------------------------------------------------------------------------------------------------------------------------------------------------------------------------------------------------------------------------------------------------------------------------------------------------------------------------------|
| Austria | Walter et al. - A public health and budget impact analysis (BIA) of vaccinating adults against pneumococcal diseases in Austria (2019) (107)        | <p><b>Type of analysis:</b> Budget impact analysis<br/> <b>Perspective:</b> Payer<br/> <b>Time horizon:</b> 5 years<br/> <b>Intervention:</b> PCV13 or PPV23<br/> <b>Comparator:</b> No vaccination<br/> <b>Type of model:</b> Budget impact model<br/> <b>Model structure available:</b> Yes<br/> <b>Health states:</b> Hospitalized and outpatient pneumococcal-diseases, IPD, associated complications and mortality<br/> <b>Cycle length:</b> NR<br/> <b>Outcomes:</b> Direct cost, indirect cost, prevention of deaths, hospitalizations and IPD cases, direct costs<br/> <b>Findings:</b> In Austria, 1€ privately invested in pneumococcal vaccination has a 1.60€ return to society and saves the health-care-system 1.19€.</p> |
| Belgium | Marbaix et al. - Cost-effectiveness of PCV13 vaccination in Belgian adults aged 65-84 years at elevated risk of pneumococcal infection (2018) (108) | <p><b>Type of analysis:</b> CUA<br/> <b>Perspective:</b> Belgian National Health Insurance perspective<br/> <b>Time horizon:</b> Lifetime<br/> <b>Intervention:</b> PCV13<br/> <b>Comparator:</b> No vaccination<br/> <b>Type of model:</b> Markov<br/> <b>Model structure available:</b> Yes<br/> <b>Health states:</b> NR<br/> <b>Cycle length:</b> NR<br/> <b>Outcomes:</b> ICER, prevention of deaths, hospitalizations and IPD cases, direct costs<br/> <b>Findings:</b> Cost per QALY gained was €17,126. In probabilistic sensitivity analyses, use of PCV13 was cost-effective in 97% of 1,000 simulations. Use of PCV13 was cost-effective.</p>                                                                                |
|         | Willem et al. - Economic evaluation of pneumococcal vaccines for adults aged over 50 years in Belgium (2018) (117)                                  | <p><b>Type of analysis:</b> CUA<br/> <b>Perspective:</b> Health care payer's perspective<br/> <b>Time horizon:</b> Lifetime<br/> <b>Intervention:</b> PPV23<br/> <b>Comparator:</b> PCV13 followed by PPV23 (sequential vaccination)<br/> <b>Type of model:</b> Static model<br/> <b>Model structure available:</b> Yes<br/> <b>Health states:</b> Model compartments and transitions regarding IPD and non-IPP (invasive pneumococcal pneumonia) incidence, mortality, and long-term effects.</p>                                                                                                                                                                                                                                      |

|         |                                                                                                                                                                                                                                  |                                                                                                                                                                                                                                                                                                                                                                                                                                                                                                                                                                                                                                                                                                                                                                                                                                                                                                                                                                       |
|---------|----------------------------------------------------------------------------------------------------------------------------------------------------------------------------------------------------------------------------------|-----------------------------------------------------------------------------------------------------------------------------------------------------------------------------------------------------------------------------------------------------------------------------------------------------------------------------------------------------------------------------------------------------------------------------------------------------------------------------------------------------------------------------------------------------------------------------------------------------------------------------------------------------------------------------------------------------------------------------------------------------------------------------------------------------------------------------------------------------------------------------------------------------------------------------------------------------------------------|
|         |                                                                                                                                                                                                                                  | <p><b>Cycle length:</b> NR</p> <p><b>Outcomes:</b> ICER, prevention of deaths, hospitalizations and IPD cases</p> <p><b>Findings:</b> Pneumococcal vaccination would be most cost-effective in Belgium, when achieving high uptake with PPV23 in 75–84-year-old, as well as by negotiating a lower market-conform PPV23 price to improve uptake and cost-effectiveness.</p>                                                                                                                                                                                                                                                                                                                                                                                                                                                                                                                                                                                           |
| Denmark | <p>Sevilla et al. - Calculating the indirect costs of adult pneumococcal disease and the rate of return to the 13-valent pneumococcal conjugate vaccine (PCV13) in older adults, with an application to Denmark (2017) (118)</p> | <p><b>Type of analysis:</b> Cost analysis</p> <p><b>Perspective:</b> NR</p> <p><b>Time horizon:</b> NR</p> <p><b>Intervention:</b> PCV13</p> <p><b>Comparator:</b> NR</p> <p><b>Type of model:</b> NR</p> <p><b>Model structure available:</b> NR</p> <p><b>Health states:</b> NR</p> <p><b>Cycle length:</b> NR</p> <p><b>Outcomes:</b> Indirect costs</p> <p><b>Findings:</b> Indirect Costs (ICs) were largely driven by the value of foregone housework from death (e.g., for inpatient community-acquired pneumonia (ICAP), deaths among adults aged 50–85 y, lost housework costs €323,096.78, followed by lost earnings [€73,119.72], lost caregiving [€22,414.03], and lost volunteering [€8804.46]). Thus, ICs are high even among retirees.</p>                                                                                                                                                                                                             |
|         | <p>Birck et al. - Health economic evaluation of introducing a PPV23-based vaccination program to adults aged 65 and above, and an extension to the 60-64 age group in Denmark (2021) (109)</p>                                   | <p><b>Type of analysis:</b> CEA</p> <p><b>Perspective:</b> Societal perspective</p> <p><b>Time horizon:</b> 5 years</p> <p><b>Intervention:</b> PPV23</p> <p><b>Comparator:</b> No vaccination</p> <p><b>Type of model:</b> Markov</p> <p><b>Model structure available:</b> Yes</p> <p><b>Health states:</b> The model divides the population into five health states:</p> <ol style="list-style-type: none"> <li>(1) no pneumococcal disease</li> <li>(2) IPD</li> <li>(3) NBPP</li> <li>(4) post-meningitis sequelae</li> <li>(5) death</li> </ol> <p><b>Cycle length:</b> 1 year</p> <p><b>Outcomes:</b> Cost-saving, prevention of deaths, hospitalizations and IPD cases, direct costs, indirect costs</p> <p><b>Findings:</b> The recent introduction of the age-based vaccination program offering PPV23 vaccination to all persons aged 65+ in Denmark is cost-effective. This is also the case if the program is extended to include persons aged 60–64.</p> |

|                    |                                                                                                 |                                                                                                                                                                                                                                                                                                                                                                                                                                                                                                                                                                                                                                                                                                                           |
|--------------------|-------------------------------------------------------------------------------------------------|---------------------------------------------------------------------------------------------------------------------------------------------------------------------------------------------------------------------------------------------------------------------------------------------------------------------------------------------------------------------------------------------------------------------------------------------------------------------------------------------------------------------------------------------------------------------------------------------------------------------------------------------------------------------------------------------------------------------------|
| European countries | Esposito et al. - The public health value of vaccination for seniors in Europe (2018) (71)      | <p><b>Type of analysis:</b> Cost analysis<br/> <b>Perspective:</b> NR<br/> <b>Time horizon:</b> NR<br/> <b>Intervention:</b> NR<br/> <b>Comparator:</b> NR<br/> <b>Type of model:</b> NR<br/> <b>Model structure available:</b> NR<br/> <b>Health states:</b> NR<br/> <b>Cycle length:</b> NR<br/> <b>Outcomes:</b> Cost-saving<br/> <b>Findings:</b> Vaccines that can prevent diseases such as influenza, pneumococcal diseases and herpes zoster in the elderly are likely to reduce not only the direct costs associated with medication but also the indirect costs associated with their side effects.</p>                                                                                                          |
| Finland            | THL (National Institute for Health and Welfare) - Pneumococcal vaccination strategy (2018) (73) | <p><b>Type of analysis:</b> CEA<br/> <b>Perspective:</b> NR<br/> <b>Time horizon:</b> NR<br/> <b>Intervention:</b> NR<br/> <b>Comparator:</b> NR<br/> <b>Type of model:</b> NR<br/> <b>Model structure available:</b> NR<br/> <b>Health states:</b> NR<br/> <b>Cycle length:</b> NR<br/> <b>Outcomes:</b> Direct costs for adults<br/> <b>Findings:</b> NR</p>                                                                                                                                                                                                                                                                                                                                                            |
| France             | HCSP - Pneumococcal infections: vaccination recommendations for adults (2017) (75)              | <p><b>Type of analysis:</b> CUA<br/> <b>Perspective:</b> NR<br/> <b>Time horizon:</b> NR<br/> <b>Intervention:</b> PCV13 or PCV13 + PPV23<br/> <b>Comparator:</b> PPV23<br/> <b>Type of model:</b> NR<br/> <b>Model structure available:</b> NR<br/> <b>Health states:</b> NR<br/> <b>Cycle length:</b> NR<br/> <b>Outcomes:</b> ICER, prevention of deaths, hospitalizations and IPD cases<br/> <b>Findings:</b> The extension of the current recommendations by adding or substituting the PCV13 vaccine for the PPV23 vaccine for subjects belonging to the medium and high-risk groups proves to be cost effective with the assumptions made as to the effectiveness of the vaccines and for ratios C/E less than</p> |

|         |                                                                                                                                                                         |                                                                                                                                                                                                                                                                                                                                                                                                                                                                                                                                                                                                                                                                                                                                                                                                                                                                                                                                                                                                                                                                                                                                                                                                                                                                                           |
|---------|-------------------------------------------------------------------------------------------------------------------------------------------------------------------------|-------------------------------------------------------------------------------------------------------------------------------------------------------------------------------------------------------------------------------------------------------------------------------------------------------------------------------------------------------------------------------------------------------------------------------------------------------------------------------------------------------------------------------------------------------------------------------------------------------------------------------------------------------------------------------------------------------------------------------------------------------------------------------------------------------------------------------------------------------------------------------------------------------------------------------------------------------------------------------------------------------------------------------------------------------------------------------------------------------------------------------------------------------------------------------------------------------------------------------------------------------------------------------------------|
|         |                                                                                                                                                                         | EUR 100,000 per QALY gained. The vaccination strategies for all subjects aged 65 to 84, regardless of the level of risk, do not appear to be usable based on the medico-economic assessment.                                                                                                                                                                                                                                                                                                                                                                                                                                                                                                                                                                                                                                                                                                                                                                                                                                                                                                                                                                                                                                                                                              |
| Germany | Kuchenbecker et al. - Estimating the cost-effectiveness of a sequential pneumococcal vaccination program for adults in Germany (2018) (79)                              | <p><b>Type of analysis:</b> CEA<br/> <b>Perspective:</b> NR<br/> <b>Time horizon:</b> Lifetime<br/> <b>Intervention:</b> Hypothetical strategies<br/>           1: sequential for all risk groups<br/>           2: Low-risk (LR) according to STIKO, sequential only for moderate-risk (MR) and high-risk (HR)<br/>           3: LR and MR initial vaccination with PCV13, HR sequential<br/>           4. 1 with immediate waning for PCV13<br/>           5. 1 with 64% NBP Effectiveness PPV23<br/>           6. 1 with 50% revaccination rate<br/>           7. 2 with 50% revaccination rate<br/> <b>Comparator:</b> Current recommendation: PPV23 for older, PCV13+PPV23 for risk groups<br/> <b>Type of model:</b> Markov<br/> <b>Model structure available:</b> Yes<br/> <b>Health states:</b> NR<br/> <b>Cycle length:</b> NR<br/> <b>Outcomes:</b> ICER, direct costs, indirect costs<br/> <b>Findings:</b> Additional costs per patient for the payer are €2.48 to €7.13 and for the society €2.20 to €6.85. The ICER per LYG ranged from €3,662 to €23,061 (payer) and €3,258 to €29,617 (societal). Compared to the vaccination strategy in place, the different hypothetical scenarios can be considered cost-effective and suitable as additional voluntary services.</p> |
|         | Kuhlmann & Graf Von Der Schulenburg - Serotype dynamics in pneumococcal diseases and the performance of vaccination strategies for older adults in Germany (2020) (119) | <p><b>Type of analysis:</b> CUA<br/> <b>Perspective:</b> NR<br/> <b>Time horizon:</b> NR<br/> <b>Intervention:</b> PCV13<br/> <b>Comparator:</b> PCV13 + PPV23 (Sequential), or PPV23<br/> <b>Type of model:</b> A dynamic transmission model<br/> <b>Model structure available:</b> Yes<br/> <b>Health states:</b> NR<br/> <b>Cycle length:</b> NR<br/> <b>Outcomes:</b> ICER<br/> <b>Findings:</b> Vaccination of older adults against PD is highly effective and very likely to be cost-effective in Germany. From an economic perspective, PPV23 or sequential vaccination would be preferred to PCV13 only.</p>                                                                                                                                                                                                                                                                                                                                                                                                                                                                                                                                                                                                                                                                      |
|         | Storch et al. - The effect of influenza and pneumococcal                                                                                                                | <p><b>Type of analysis:</b> Cost analysis<br/> <b>Perspective:</b> Health insurers' perspective</p>                                                                                                                                                                                                                                                                                                                                                                                                                                                                                                                                                                                                                                                                                                                                                                                                                                                                                                                                                                                                                                                                                                                                                                                       |

|       |                                                                                                                                                                                                            |                                                                                                                                                                                                                                                                                                                                                                                                                                                                                                                                                                                                                                                                                                                                                                                                                                                                                                                                |
|-------|------------------------------------------------------------------------------------------------------------------------------------------------------------------------------------------------------------|--------------------------------------------------------------------------------------------------------------------------------------------------------------------------------------------------------------------------------------------------------------------------------------------------------------------------------------------------------------------------------------------------------------------------------------------------------------------------------------------------------------------------------------------------------------------------------------------------------------------------------------------------------------------------------------------------------------------------------------------------------------------------------------------------------------------------------------------------------------------------------------------------------------------------------|
|       | vaccination in the elderly on health service utilization and costs: a claims data-based cohort study (2022) (110)                                                                                          | <p><b>Time horizon:</b> NR</p> <p><b>Intervention:</b> Pneumococcal vaccinations</p> <p><b>Comparator:</b> No vaccination</p> <p><b>Type of model:</b> NR</p> <p><b>Model structure available:</b> NR</p> <p><b>Health states:</b> NR</p> <p><b>Cycle length:</b> NR</p> <p><b>Outcomes:</b> Cost-saving, direct costs</p> <p><b>Findings:</b> Overall cost savings of pneumococcal vaccination were not statistically significant in both years, but disease-related outpatient care costs were lower in pneumococci-vaccinated individuals in 2015 [- €9.43; 95% CI - €17.56;- €1.30] and 2016 [- €12.93; 95% CI - €25.37;- €0.48].</p>                                                                                                                                                                                                                                                                                      |
| Italy | Boccalini et al. - Economic studies applied to vaccines against invasive diseases: An updated budget impact analysis of age-based pneumococcal vaccination strategies in the elderly in Italy (2017) (111) | <p><b>Type of analysis:</b> Budget impact analysis</p> <p><b>Perspective:</b> NR</p> <p><b>Time horizon:</b> NR</p> <p><b>Intervention:</b> PCV13</p> <p><b>Comparator:</b> No vaccination</p> <p><b>Type of model:</b> Decision tree model</p> <p><b>Model structure available:</b> NR</p> <p><b>Health states:</b> NR</p> <p><b>Cycle length:</b> NR</p> <p><b>Outcomes:</b> ICER, prevention of deaths, hospitalizations and IPD cases, direct costs</p> <p><b>Findings:</b> The new impact analysis highlights that the vaccination of one, two or three adult cohorts per year in Italy would lead to a considerable reduction in pneumococcal disease and its related costs over 5 years. The strategies proved cost-effective (ICERs ranging from €14,605 to €15,412/QALY), i.e. well below the threshold of €50,000/QALY. Vaccination of the elderly should therefore be strongly recommended nationwide in Italy.</p> |
|       | Sanduzzi et al. - Impact of 13-valent vaccine for prevention of pneumococcal diseases in children and adults at risk: Possible scenarios in Campania region (2019) (112)                                   | <p><b>Type of analysis:</b> Budget impact analysis</p> <p><b>Perspective:</b> NR</p> <p><b>Time horizon:</b> NR</p> <p><b>Intervention:</b> PCV13</p> <p><b>Comparator:</b> No vaccination</p> <p><b>Type of model:</b> NR</p> <p><b>Model structure available:</b> NR</p> <p><b>Health states:</b> NR</p> <p><b>Cycle length:</b> NR</p> <p><b>Outcomes:</b> Cost-saving, direct costs, prevention of pneumococcal disease cases</p> <p><b>Findings:</b> Offering anti-pneumococcal vaccine to adults at risk would generate a return of around 29 million euros. Offering anti-pneumococcal 13-valent vaccine was proven to be a helpful political health</p>                                                                                                                                                                                                                                                                |

|          |                                                                                                                                                                                                                              |                                                                                                                                                                                                                                                                                                                                                                                                                                                                                                                                                                                                                                                                                                                                                                                                                                                                                                                                              |
|----------|------------------------------------------------------------------------------------------------------------------------------------------------------------------------------------------------------------------------------|----------------------------------------------------------------------------------------------------------------------------------------------------------------------------------------------------------------------------------------------------------------------------------------------------------------------------------------------------------------------------------------------------------------------------------------------------------------------------------------------------------------------------------------------------------------------------------------------------------------------------------------------------------------------------------------------------------------------------------------------------------------------------------------------------------------------------------------------------------------------------------------------------------------------------------------------|
|          |                                                                                                                                                                                                                              | strategy, not only in consideration of a reduction of cases but also in view of the favorable economic impacts.                                                                                                                                                                                                                                                                                                                                                                                                                                                                                                                                                                                                                                                                                                                                                                                                                              |
| Portugal | Gouveia et al. - Cost-effectiveness of the 13-valent pneumococcal conjugate vaccine in adults in Portugal versus "no vaccination" and versus vaccination with the 23-valent pneumococcal polysaccharide vaccine (2019) (114) | <p><b>Type of analysis:</b> CUA, CEA<br/> <b>Perspective:</b> Societal perspective<br/> <b>Time horizon:</b> Lifetime<br/> <b>Intervention:</b> PCV13 or PPV23<br/> <b>Comparator:</b> No vaccination or PPV23<br/> <b>Type of model:</b> Markov<br/> <b>Model structure available:</b> Yes<br/> <b>Health states:</b> NR<br/> <b>Cycle length:</b> 1 year<br/> <b>Outcomes:</b> ICER, Life-year gained, QALY, indirect costs, direct costs<br/> <b>Findings:</b> PCV13 showed ICERs of €17,746/QALY and €13,146/QALY versus "no vaccination" and vaccination with PPV23, respectively. It was found that PCV13 is a cost-effective strategy to prevent pneumococcal disease in adults in Portugal.</p>                                                                                                                                                                                                                                      |
| Spain    | Gomez et al. - Economic evaluation of 60+ years adult vaccination strategy using pneumococcal polysaccharide vaccine in Spain (2018) (120)                                                                                   | <p><b>Type of analysis:</b> CUA<br/> <b>Perspective:</b> Spanish National Healthcare System<br/> <b>Time horizon:</b> Lifetime<br/> <b>Intervention:</b> PPV23<br/> <b>Comparator:</b> PCV13 followed by PPV23 (sequential vaccination)<br/> <b>Type of model:</b> Markov<br/> <b>Model structure available:</b> NR<br/> <b>Health states:</b> NR<br/> <b>Cycle length:</b> NR<br/> <b>Outcomes:</b> ICER, prevention of deaths, and IPD cases<br/> <b>Findings:</b> The sequential strategy presented a larger number of quality-adjusted life-years (QALYs) compared to PPV23 alone but also increased the total costs by more than €218 million, resulting an ICER of €42,259 per QALY gained. A sequential vaccination strategy of immunocompetent adults aged 60+ with PCV13-PPV23 would result in an improvement in health outcomes, but at a cost exceeding typical cost-effective benchmarks for Spain, compared to PPV23 alone.</p> |
| Sweden   | Wolff et al. - Cost-effectiveness of pneumococcal vaccination for elderly in Sweden (2020) (115)                                                                                                                             | <p><b>Type of analysis:</b> CUA<br/> <b>Perspective:</b> Health-care perspective<br/> <b>Time horizon:</b> 5 years<br/> <b>Intervention:</b> PCV13<br/> <b>Comparator:</b> PPV23<br/> <b>Type of model:</b> Decision-tree model<br/> <b>Model structure available:</b> Yes</p>                                                                                                                                                                                                                                                                                                                                                                                                                                                                                                                                                                                                                                                               |

|                 |                                                                                                                                                                                                             |                                                                                                                                                                                                                                                                                                                                                                                                                                                                                                                                                                                                                                                                                                                                                                                                                                                                                                                                                                                                                                                                                                   |
|-----------------|-------------------------------------------------------------------------------------------------------------------------------------------------------------------------------------------------------------|---------------------------------------------------------------------------------------------------------------------------------------------------------------------------------------------------------------------------------------------------------------------------------------------------------------------------------------------------------------------------------------------------------------------------------------------------------------------------------------------------------------------------------------------------------------------------------------------------------------------------------------------------------------------------------------------------------------------------------------------------------------------------------------------------------------------------------------------------------------------------------------------------------------------------------------------------------------------------------------------------------------------------------------------------------------------------------------------------|
|                 |                                                                                                                                                                                                             | <p>Health states: The model considered the following disease categories; invasive pneumococcal disease (IPD), and community-acquired pneumonia (CAP). All individuals with IPD were assumed to be hospitalized, whereas individuals with CAP could either be hospitalized or cared for at home with additional visits to general practitioners (GP) at outpatient health care centers</p> <p>Cycle length: 1 year</p> <p>Outcomes: ICER, QALY, direct costs</p> <p>Findings: The cost per gained QALY was estimated to EUR 94,000 for vaccinating 65-year-olds and EUR 29,500 for 75-year-olds. With one dose PCV13 given instead of PPV23, the cost per gained QALY would increase by around 400% for both cohorts. Introducing a vaccination program against pneumococcal disease for 65-year-olds in Sweden is unlikely to be cost-effective, whereas it for 75-year-olds and using PPV23 can be considered good value for money. Our model indicates that vaccine price needs to be reduced by 55% for vaccination of 65-year-olds to be cost-effective, given a threshold of EUR 50,000.</p> |
| The Netherlands | Zorginstituut - Vaccination of pneumococci over 60s is financed outside the Health Insurance Act (2018) (92)                                                                                                | <p>Type of analysis: CEA</p> <p>Perspective: NR</p> <p>Time horizon: NR</p> <p>Intervention: PCV13 or PPV23</p> <p>Comparator: none</p> <p>Type of model: NR</p> <p>Model structure available: NR</p> <p>Health states: NR</p> <p>Cycle length: NR</p> <p>Outcomes: ICER, prevention of deaths, hospitalizations and IPD cases</p> <p>Findings: Single vaccination of the elderly at age 65 with PCV13 (compared to existing vaccination of children with PCV10) leads on average to a reduction of 11 deaths, 41 cases of IPD, 45 hospitalizations for pneumococcal pneumonia. The ICER compared to the current situation, amounts to € 44,028 per QALY. Vaccinating the elderly against pneumococci with PPV23, PCV13 or vaccinating children with PCV13 instead of PCV10 for indirect protection of the elderly, results in a reduction of the disease burden. The benefit-risk ratio is favorable in all three strategies. The Committee finds the most effective approach to vaccination of elderly people with PPV23 at age 60 with recurrence at age 65, 70, and 75.</p>                   |
|                 | Rozenbaum - Cost-effectiveness of sequential vaccination with the 13-valent pneumococcal conjugate vaccine (PCV13) followed by the 23 valent polysaccharide vaccine (PPV23) in the Netherlands (2018) (121) | <p><b>Type of analysis:</b> CUA</p> <p><b>Perspective:</b> Societal perspective</p> <p><b>Time horizon:</b> Lifetime</p> <p><b>Intervention:</b> PCV13 followed by PPV23 (sequential vaccination)</p> <p><b>Comparator:</b> PPV23</p> <p><b>Type of model:</b> Microsimulation model</p> <p><b>Model structure available:</b> NR</p> <p><b>Health states:</b> NR</p> <p><b>Cycle length:</b> NR</p>                                                                                                                                                                                                                                                                                                                                                                                                                                                                                                                                                                                                                                                                                               |



|                 |                                                                                                                                                                                                        |                                                                                                                                                                                                                                                                                                                                                                                                                                                                                                                                                                                                                                                                                                                                                                                                                                                                                                                                                                                                                                                                                                                                                                                                                                                                                                                                                 |
|-----------------|--------------------------------------------------------------------------------------------------------------------------------------------------------------------------------------------------------|-------------------------------------------------------------------------------------------------------------------------------------------------------------------------------------------------------------------------------------------------------------------------------------------------------------------------------------------------------------------------------------------------------------------------------------------------------------------------------------------------------------------------------------------------------------------------------------------------------------------------------------------------------------------------------------------------------------------------------------------------------------------------------------------------------------------------------------------------------------------------------------------------------------------------------------------------------------------------------------------------------------------------------------------------------------------------------------------------------------------------------------------------------------------------------------------------------------------------------------------------------------------------------------------------------------------------------------------------|
|                 |                                                                                                                                                                                                        | <p><b>Outcomes:</b> ICER, prevention of deaths, and IPD cases</p> <p><b>Findings:</b> At list price (€68.56 for PCV13 and €19.99 for PPV23) the ICER of vaccinating all adults of <math>\geq 60</math> years of age resulted in an ICER of €8,936/QALY. Adding a single dose of PCV13 for those with chronic medical conditions (moderate risk) and immunocompromising conditions (high risk) was shown to be highly cost-effective compared to vaccination with PPV23 alone.</p>                                                                                                                                                                                                                                                                                                                                                                                                                                                                                                                                                                                                                                                                                                                                                                                                                                                               |
| The Netherlands | de Vries et al. - Don't forget about the future: The impact of including future costs on the cost-effectiveness of adult pneumococcal conjugate vaccination with PCV13 in the Netherlands (2021) (122) | <p><b>Type of analysis:</b> CUA</p> <p><b>Perspective:</b> NR</p> <p><b>Time horizon:</b> NR</p> <p><b>Intervention:</b> PCV13</p> <p><b>Comparator:</b> No vaccination</p> <p><b>Type of model:</b> NR</p> <p><b>Model structure available:</b> NR</p> <p><b>Health states:</b> NR</p> <p><b>Cycle length:</b> NR</p> <p><b>Outcomes:</b> ICER, direct costs, indirect costs</p> <p><b>Findings:</b> For the base-case strategy, the original incremental cost-effectiveness ratio (ICER) of PVC13 was €9,157 per quality adjusted life-year (QALY). Including all future medical costs increased the ICER to €28,540 per QALY. Also including future non-medical costs resulted in an ICER of €45,691 per QALY. This study showed a substantial effect of the inclusion of future costs on the ICER of vaccinating with PCV13. Especially when lives of people with underlying health conditions are extended, the impact of future medical costs is large. This inclusion may make vaccination a less attractive option, especially in relation to low thresholds as often applied for prevention. Although this raises important questions, ignoring these real future costs may lead to an inefficient use of healthcare resources. The study results may imply that prices for some vaccines need to be lowered to be cost-effective.</p> |
|                 | Thorrington et al. - Impact and cost-effectiveness of different vaccination strategies to reduce the burden of pneumococcal disease among elderly in the Netherlands (2018) (116)                      | <p><b>Type of analysis:</b> CUA &amp; budget impact</p> <p><b>Perspective:</b> Health care provider's perspective</p> <p><b>Time horizon:</b> 10 years</p> <p><b>Intervention:</b> PCV13</p> <p><b>Comparator:</b> PPV23</p> <p><b>Type of model:</b> NR</p> <p><b>Model structure available:</b> NR</p> <p><b>Health states:</b> NR</p> <p><b>Cycle length:</b> NR</p> <p><b>Outcomes:</b> ICER, QALY, prevention of deaths, hospitalizations and IPD cases, direct costs, indirect costs</p> <p><b>Findings:</b> The most cost-effective strategy was vaccinating with PPV23 at 70 years only with similar low ICERs at age 60 and 65. Vaccinating elderly with either PCV13 or PPV23 was dominated by PPV23 in all investigated scenarios, mainly due to the lower price of PPV23. The best value for money was the use of PPV23 for elderly, with a single dose or at five-year increment between age 60 to age 70.</p>                                                                                                                                                                                                                                                                                                                                                                                                                     |

|                                                                                                                                                                        |                                                                                                                                                                                                                                                                                                                                                                                                                                                                                                                                                                                                                                                                                                                                                                                                                                                                                                                                                                                                                                                                                                                                                                                                                                                                                                              |
|------------------------------------------------------------------------------------------------------------------------------------------------------------------------|--------------------------------------------------------------------------------------------------------------------------------------------------------------------------------------------------------------------------------------------------------------------------------------------------------------------------------------------------------------------------------------------------------------------------------------------------------------------------------------------------------------------------------------------------------------------------------------------------------------------------------------------------------------------------------------------------------------------------------------------------------------------------------------------------------------------------------------------------------------------------------------------------------------------------------------------------------------------------------------------------------------------------------------------------------------------------------------------------------------------------------------------------------------------------------------------------------------------------------------------------------------------------------------------------------------|
| <p>Zeevat et al. - Cost-effectiveness analysis on elderly pneumococcal vaccination in the Netherlands: challenging the Dutch health council's advice (2019) (123)</p>  | <p><b>Type of analysis:</b> CUA<br/> <b>Perspective:</b> Societal perspective<br/> <b>Time horizon:</b> 10 years<br/> <b>Intervention:</b> PCV13<br/> <b>Comparator:</b> PPV23<br/> <b>Type of model:</b> NR<br/> <b>Model structure available:</b> NR<br/> <b>Health states:</b> NR<br/> <b>Cycle length:</b> NR<br/> <b>Outcomes:</b> ICER<br/> <b>Findings:</b> best estimates of cost-effectiveness for PCV13 are consistently (well) below €20,000 per QALY, which reflects an often-used threshold for vaccines. Conjugated vaccine seems cost-effective. For one-off vaccination of 65-years old elderly, the use of PCV13 over PPV23 was estimated at €31,365 per QALY (UC: 26,012-46,340) at listed prices. However, when we applied a 50% reduction for both vaccines and PCV13 alone, incremental cost-effectiveness reduced to €13,364 (UC: 11,273-15,996) and €5,950 (UC: 3,232-5,960) per QALY, respectively. The PCV13 break-even prices were estimated at 61% (50-69) of the list price at a threshold of €20,000 and above list prices for thresholds of €40,000 per QALY and above. PCV13 and PPV23 are both potentially cost-effective options of elderly pneumococcal vaccination, when an adequate and consistent perspective is taken in the analyses of the Dutch Health Council.</p> |
| <p>Rozenbaum - The cost-effectiveness of vaccinating adults at increased risk of pneumococcal disease against pneumococcal disease in the Netherlands (2018) (124)</p> | <p><b>Type of analysis:</b> CUA<br/> <b>Perspective:</b> NR<br/> <b>Time horizon:</b> NR<br/> <b>Intervention:</b> PCV13<br/> <b>Comparator:</b> PPV23<br/> <b>Type of model:</b> Markov<br/> <b>Model structure available:</b> NR<br/> <b>Health states:</b> NR<br/> <b>Cycle length:</b> NR<br/> <b>Outcomes:</b> ICER, direct costs<br/> <b>Findings:</b> At list price (€68.56 for PCV13 and €19.99 for PPV23), vaccination of all adults at increased risk of pneumococcal disease resulted in an ICER of €20,186/QALY, while vaccinating those with chronic medical conditions (moderate risk) and immunocompromising conditions (high risk) resulted in an ICER of &lt;€10,000/QALY. Large differences in ICERs between age-and risk-groups were observed. Vaccinating, high-risk individuals with PCV13 was cost-saving for those aged less than 65 years of age compared with PPV23 while vaccinating those aged 85 years and older with PCV13 was moderate cost-effective with an ICER of €60,900/QALY. Vaccinating moderate risk individuals was highly cost-effective (&lt;€20,000/QALY), while vaccinating those with low risk of pneumococcal infection was cost-effective</p>                                                                                                                 |

|                                                                                                                                                                                                                                                                                                                                                                                                                                                                                                                                                                                                                                                            |  |                                                                                                                                                                                                                                                                                                                                                                            |
|------------------------------------------------------------------------------------------------------------------------------------------------------------------------------------------------------------------------------------------------------------------------------------------------------------------------------------------------------------------------------------------------------------------------------------------------------------------------------------------------------------------------------------------------------------------------------------------------------------------------------------------------------------|--|----------------------------------------------------------------------------------------------------------------------------------------------------------------------------------------------------------------------------------------------------------------------------------------------------------------------------------------------------------------------------|
|                                                                                                                                                                                                                                                                                                                                                                                                                                                                                                                                                                                                                                                            |  | ( $<€50,000/QALY$ ). However, within risk groups the ICER differed significantly between age groups. Vaccination all adults with PCV13 is cost effective compared with PPV23. There is a large variation in the cost-effectiveness between age and risk groups. Targeting individuals with underlying diseases aged less than 85 years would provide most value for money. |
| <b>Key:</b> BIA=Budget impact analysis; CAP=Community-acquired pneumonia; CE=Cost effectiveness; CEA=Cost-effectiveness analysis; CUA=Cost utility analysis; GP=General practitioner; IC=Indirect cost; ICAP=Inpatient community-acquired pneumonia; ICER=Incremental cost-effectiveness ratio; IPD=Invasive pneumococcal disease; IPP=Invasive pneumococcal pneumonia; LYG=Life year gained; NBPP=Notice of Benefit and Payment Parameters; NR=Not reported; PCV13=13-valent Pneumococcal Conjugate Vaccine; PPV23=23-valent Pneumococcal Polysaccharide Vaccine; QALY=Quality-adjusted life-year; STIKO=Ständige Impfkommission; UC=Uncertainty interval |  |                                                                                                                                                                                                                                                                                                                                                                            |

Table S9: Summary of VCR data (n=41)

| Country | Title (publication year)                                                                                                     | Description of population                                                                            | Type of vaccine         | VCR or serotype coverage rate? | Time period                | Coverage rate (%)                                                                                                                                                                                                                                                                                                                                                                                                                                                                                                                                                                                                                                                                                              |
|---------|------------------------------------------------------------------------------------------------------------------------------|------------------------------------------------------------------------------------------------------|-------------------------|--------------------------------|----------------------------|----------------------------------------------------------------------------------------------------------------------------------------------------------------------------------------------------------------------------------------------------------------------------------------------------------------------------------------------------------------------------------------------------------------------------------------------------------------------------------------------------------------------------------------------------------------------------------------------------------------------------------------------------------------------------------------------------------------|
| Austria | A public health and budget impact analysis (BIA) of vaccinating adults against pneumococcal diseases in Austria (2019) (107) | >50 years and "at risk" (respiratory and CV diseases, diabetes, HIV, and immunocompromised patients) | PPV23 ± PCV13           | VCR                            | 2018-2023                  | These are all estimates based on Austrian market research <ul style="list-style-type: none"> <li>• Year 0 (2018): 15%</li> <li>• Year 1 (2019): 16%</li> <li>• Year 2 (2020): 17%</li> <li>• Year 3 (2021): 18%</li> <li>• Year 4 (2022): 19%</li> <li>• Year 5 (2023): 20%</li> </ul>                                                                                                                                                                                                                                                                                                                                                                                                                         |
|         | Towards understanding vaccine hesitancy and vaccination refusal in Austria (2021) (125)                                      | Adults (16+)                                                                                         | NR                      | VCR                            | 2016                       | 5.1%                                                                                                                                                                                                                                                                                                                                                                                                                                                                                                                                                                                                                                                                                                           |
| Belgium | Report 9674 Vaccination against pneumococcal disease (adults) (2022) (65)                                                    | Adult, elderly, and at-risk population                                                               | NR                      | VCR                            | 2004-2018<br><br>2014-2018 | <ul style="list-style-type: none"> <li>• Elderly people &gt; 65 years old: 8.5%</li> <li>• &gt; 45 years old with an increased risk of pneumococcal infection: 12.6% (Finaba et al., 2018).</li> </ul> <p>At-risk Groups: 32% (Boey et al., 2020).<br/>Adult population: 18.7% ((de Burghgraeve et al., 2020).</p>                                                                                                                                                                                                                                                                                                                                                                                             |
|         | Economic evaluation of pneumococcal vaccines for adults aged over 50 years in Belgium (2018) (117)                           | Adults and elderly                                                                                   | PPV23,<br>PPV23 ± PCV13 | VCR                            | 2015                       | <p>Vaccination uptake by age in Belgium in 2015 (calculated as the yearly mean of the 2004, 2008 and 2013 five-year accumulated uptake and the uptake estimates for 2015 are based on the average seasonal influenza uptake):<br/>Estimated (2015) situation with PPV23:</p> <ul style="list-style-type: none"> <li>• 50-64 years: 0.79%</li> <li>• 65-74 years: 2.46%</li> <li>• 75-84 years: 3.01%</li> <li>• 85-105 years: 2.48%</li> </ul> <p>Program with increased PPV23 and/or PCV13 uptake:</p> <ul style="list-style-type: none"> <li>• 50-64 years: 25%</li> <li>• 65-74 years: 50%</li> <li>• 75-84 years: 60%</li> <li>• 85-105 years: 40%</li> </ul> <p>Revaccination (PPV23, after 5 years):</p> |

| Country | Title (publication year)                                                                                                                                                     | Description of population | Type of vaccine | VCR or serotype coverage rate? | Time period | Coverage rate (%)                                                                                                                                                                                                                                                                                                                                                                                                                                                                                                                                                                                                |
|---------|------------------------------------------------------------------------------------------------------------------------------------------------------------------------------|---------------------------|-----------------|--------------------------------|-------------|------------------------------------------------------------------------------------------------------------------------------------------------------------------------------------------------------------------------------------------------------------------------------------------------------------------------------------------------------------------------------------------------------------------------------------------------------------------------------------------------------------------------------------------------------------------------------------------------------------------|
|         |                                                                                                                                                                              |                           |                 |                                |             | <ul style="list-style-type: none"> <li>• 50-64 years: 15%</li> <li>• 65-74 years: 25%</li> <li>• 75-84 years: 25%</li> <li>• 85-105 years: 20%</li> </ul>                                                                                                                                                                                                                                                                                                                                                                                                                                                        |
|         | The incidence of lower respiratory tract infections and pneumococcal vaccination status in adults in Flemish primary care (2021) (66)                                        | Adults at risk of PD      | PPV23, PCV13    | VCR                            | 2015        | <ul style="list-style-type: none"> <li>• PPV23: 5.1%</li> <li>• PCV13: 0.6%</li> </ul> <ul style="list-style-type: none"> <li>• Targeted population (adults at high risk of pneumococcal infection): 18.7%</li> <li>• Non-target population (all patients aged 18–49 and low-risk patients aged 50–65): 0.9%</li> </ul> <p>Age group: 50–64 years</p> <ul style="list-style-type: none"> <li>• medium-risk group: 5.6%</li> <li>• high-risk group: 17.8%</li> </ul> <p>Age group: 65–84 years</p> <ul style="list-style-type: none"> <li>• medium-risk group: 26.5%</li> <li>• high-risk group: 34.0%</li> </ul> |
|         | Cost-effectiveness of PCV13 vaccination in Belgian adults aged 65-84 years at elevated risk of pneumococcal infection (2018) (108)                                           | Elderly                   | PCV13           | VCR                            | NR          | 58%                                                                                                                                                                                                                                                                                                                                                                                                                                                                                                                                                                                                              |
| Croatia | Serotype distribution and antimicrobial resistance of invasive Streptococcus pneumoniae isolates among Croatian adults during a fifteen-year period (2005-2019) (2022) (126) | Adults                    | PPV23, PCV13    | Serotype coverage              | 2005-2019   | <ul style="list-style-type: none"> <li>• PCV13: 80.2%</li> <li>• PPV23: 93.6%</li> </ul> <p>Elderly people (≥65 years):</p> <ul style="list-style-type: none"> <li>• PCV13: 79.2%</li> <li>• PPV23: 93.9%</li> </ul>                                                                                                                                                                                                                                                                                                                                                                                             |
| Denmark | Health economic evaluation of introducing a PPV23-based vaccination program to adults                                                                                        | Elderly                   | PPV23           | Serotype coverage              | 2017        | PPV23: 73% (of IPD cases)                                                                                                                                                                                                                                                                                                                                                                                                                                                                                                                                                                                        |

| Country | Title (publication year)                                                                                                                                              | Description of population                                                | Type of vaccine        | VCR or serotype coverage rate? | Time period                                                                    | Coverage rate (%)                                                                                                                                                                                                                                                                                                                                                                                                                                                                                                                                                                                                                                                      |
|---------|-----------------------------------------------------------------------------------------------------------------------------------------------------------------------|--------------------------------------------------------------------------|------------------------|--------------------------------|--------------------------------------------------------------------------------|------------------------------------------------------------------------------------------------------------------------------------------------------------------------------------------------------------------------------------------------------------------------------------------------------------------------------------------------------------------------------------------------------------------------------------------------------------------------------------------------------------------------------------------------------------------------------------------------------------------------------------------------------------------------|
|         | aged 65 and above, and an extension to the 60-64 age group in Denmark (2021) (109)                                                                                    |                                                                          |                        |                                |                                                                                |                                                                                                                                                                                                                                                                                                                                                                                                                                                                                                                                                                                                                                                                        |
|         | The coverage of influenza and pneumococcal vaccination among HIV-infected patients in Denmark: A cross-sectional survey (2018) (127)                                  | HIV                                                                      | NR                     | VCR                            | 2016-2017                                                                      | 4% (calculated from the 13 offered and then 9 accepted (out of 203 patients).                                                                                                                                                                                                                                                                                                                                                                                                                                                                                                                                                                                          |
|         | The coverage of influenza and pneumococcal vaccination among kidney transplant recipients and waiting list patients: A cross-sectional survey in Denmark (2021) (128) | Kidney transplant recipients and kidney transplant waiting list patients | NR                     | VCR                            | 2017-2019                                                                      | 4%                                                                                                                                                                                                                                                                                                                                                                                                                                                                                                                                                                                                                                                                     |
|         | Pneumococcal infections: vaccination recommendations for adults (2017) (75)                                                                                           | Adults                                                                   | PPV23, PCV13           | VCR                            | NR                                                                             | <ul style="list-style-type: none"> <li>• PCV13: 20%</li> <li>• PPV23: 20%</li> </ul>                                                                                                                                                                                                                                                                                                                                                                                                                                                                                                                                                                                   |
| France  | Pneumococcal vaccination coverage in France by general practitioners in adults with a high risk of pneumococcal disease (2021) (78)                                   | Adults diagnosed with chronic disease (COPD, DM, CHF, and HIV)           | PCV13 and PPV23, PPV23 | VCR                            | Control period (March 2012–March 2013)<br>Study period (April 2013–April 2017) | <p>Overall VCR for patients diagnosed with one or more of chronic disease</p> <p>Control period: 6%)<br/>Study period: 4%)</p> <p>COPD: Study period: 5%<br/>Control period: 7%</p> <p>DM: Study period: 2%<br/>Control period: 2%</p> <p>CHF: Study period: 4%<br/>Control period: 7%</p> <p>HIV: Study period: 12%<br/>Control period: 16%</p> <ul style="list-style-type: none"> <li>• The majority of vaccinated COPD patients received the recommended vaccine (PPV23): 339 (57%) in the study and 152 (71%) in the control periods, respectively.</li> <li>• The majority of vaccinated patients with DM received the recommended vaccine (PPV23): 53</li> </ul> |

| Country | Title (publication year)                                                                                                                                       | Description of population                | Type of vaccine | VCR or serotype coverage rate? | Time period | Coverage rate (%)                                                                                                                                                                                                                                                                                                                                                                                                                                                                                                                                                |
|---------|----------------------------------------------------------------------------------------------------------------------------------------------------------------|------------------------------------------|-----------------|--------------------------------|-------------|------------------------------------------------------------------------------------------------------------------------------------------------------------------------------------------------------------------------------------------------------------------------------------------------------------------------------------------------------------------------------------------------------------------------------------------------------------------------------------------------------------------------------------------------------------------|
|         |                                                                                                                                                                |                                          |                 |                                |             | <p>(56%) in the study and 18 (64%) in the control periods, respectively.</p> <ul style="list-style-type: none"> <li>The majority of vaccinated patients with CHF received the recommended vaccine (PPV23): 18 (64%) in the study and 8 (80%) in the control periods, respectively.</li> <li>Conversely, of the vaccinated HIV-infected patients, less than half, 16 (46%), received the recommended schedule (PCV13 and PPV23 8 weeks later) in the study period and only three (19%) received the recommended vaccine (PPV23) in the control period.</li> </ul> |
|         | Infectious disease consultation is effective in boosting vaccine coverage in patients awaiting kidney transplantation: A French prospective study (2021) (129) | Patients awaiting kidney transplantation | PCV13 and PPV23 | VCR                            | 2014-2018   | Pneumococcal complete PCV 13 and PP23V: 6%                                                                                                                                                                                                                                                                                                                                                                                                                                                                                                                       |
|         | Observational study of vaccination in cancer patients: How can vaccine coverage be improved? (2020) (130)                                                      | Cancer patients                          | NR              | VCR                            | 2016        | 7.3%                                                                                                                                                                                                                                                                                                                                                                                                                                                                                                                                                             |
|         | Pneumococcal purpura fulminans in asplenic or hyposplenic patients: A French multicenter exposed-unexposed retrospective cohort study (2020) (131)             | Asplenic or hyposplenic patients         | NR              | VCR                            | 2000-2016   | 35%                                                                                                                                                                                                                                                                                                                                                                                                                                                                                                                                                              |
|         | Pneumococcal and influenza vaccination coverage among at-risk adults: A 5-year French national observational study (2022) (77)                                 | Adults at risk of pneumococcal diseases  | NR              | VCR                            | 2014-2018   | <p>All patients at risk of pneumococcal diseases</p> <ul style="list-style-type: none"> <li>2014: 464,376 (12.7%)</li> <li>2015: 365,011 (9.8%)</li> <li>2016: 354,740 (9.3%)</li> <li>2017: 337,480 (8.6%)</li> <li>2018: 182,730 (4.5%)</li> </ul>                                                                                                                                                                                                                                                                                                             |

| Country | Title (publication year)                                                                                                                                                                                        | Description of population  | Type of vaccine        | VCR or serotype coverage rate? | Time period | Coverage rate (%)                                                                                                                                                                                                                                                                                                                                                                                                                                                             |
|---------|-----------------------------------------------------------------------------------------------------------------------------------------------------------------------------------------------------------------|----------------------------|------------------------|--------------------------------|-------------|-------------------------------------------------------------------------------------------------------------------------------------------------------------------------------------------------------------------------------------------------------------------------------------------------------------------------------------------------------------------------------------------------------------------------------------------------------------------------------|
|         |                                                                                                                                                                                                                 |                            |                        |                                |             | Immunocompromised patients: <ul style="list-style-type: none"> <li>• 2014: 50,298 (10.3%)</li> <li>• 2015: 53,132 (10.4%)</li> <li>• 2016: 57,130 (10.7%)</li> <li>• 2017: 77,405 (13.8%)</li> <li>• 2018: 106,977 (18.8%)</li> </ul>                                                                                                                                                                                                                                         |
|         | Effectiveness of a multifaceted informational-based and text message reminders on pneumococcal and influenza vaccinations in hospital emergency departments: A cluster-randomized controlled trial (2021) (132) | Elderly                    | NR                     | VCR                            | 2015-2016   | Self-reported 6-month pneumococcal vaccination: <ul style="list-style-type: none"> <li>• Intervention arm - Three text message reminders sent to patients every two weeks (n = 780): 6.4%</li> <li>• Control - nonstructured information only (n = 695): 4.6%</li> </ul>                                                                                                                                                                                                      |
|         | Adherence to STIKO recommendations in patients with pulmonary disease in southeast Germany (2021) (81)                                                                                                          | Pulmonary disease          | PCV13 and PPV23, PPV23 | VCR                            | 2019-2020   | <ul style="list-style-type: none"> <li>• Any indication: 29.5 %</li> <li>• Occupational Vaccination - for increased occupational risk: 8.3 %</li> <li>• Indication Vaccination (I) - for increased risk (not occupational): <ul style="list-style-type: none"> <li>• a) PCV13 followed by PPV23: 9.2 %</li> <li>• b) PPV23: 35.1 %</li> </ul> </li> <li>• Standard Vaccination (S) - for universal application (also age-dependent recommendations): PPV23: 38.9 %</li> </ul> |
| Germany | Estimating the cost-effectiveness of a sequential pneumococcal vaccination program for adults in Germany (2018) (79)                                                                                            | Adults                     | PCV13 ± PPV23          | VCR                            | 2012        | Assumption: 31.40% (information is taken from the Federal Health Monitoring with 2012 as reference year)                                                                                                                                                                                                                                                                                                                                                                      |
|         | Pneumococcal vaccination rates in immunocompromised patients—A cohort study based on claims data from more than 200,000 patients in Germany (2019) (133)                                                        | Immunocompromised patients | PCV13                  | VCR                            | 2013-2014   | <ul style="list-style-type: none"> <li>• Overall: 4.4% (95%-CI: 4.3%-4.5%)</li> <li>• Eastern Germany: 6.5% (6.0%-6.9%)</li> <li>• Western Germany: 4.2% (4.1–4.3%)</li> </ul> Patients starting immunosuppressants with underlying rheumatoid arthritis: 11.5% (10.1%-13.0%) <ul style="list-style-type: none"> <li>• HIV patients: 9.9% (7.8%-12.4%)</li> </ul>                                                                                                             |



| Country | Title (publication year)                                                                                                                                                          | Description of population                            | Type of vaccine             | VCR or serotype coverage rate? | Time period | Coverage rate (%)                                                                                                                                                                                                                                                                                                              |
|---------|-----------------------------------------------------------------------------------------------------------------------------------------------------------------------------------|------------------------------------------------------|-----------------------------|--------------------------------|-------------|--------------------------------------------------------------------------------------------------------------------------------------------------------------------------------------------------------------------------------------------------------------------------------------------------------------------------------|
|         | PROGNOSIS-the German bronchiectasis registry: First results (2017) (134)                                                                                                          | Elderly people with bronchiectasis                   | PPV23, PCV13                |                                | 2017        | <ul style="list-style-type: none"> <li>• PPV23: 50%</li> <li>• PCV13: 38%</li> </ul>                                                                                                                                                                                                                                           |
|         | Vaccination management for elderly patients in primary care settings – Documentation and responsibilities during a vaccination campaign (2019) (135)                              | Elderly people                                       | NR                          | VCR                            | 2016-2017   | 30.30%                                                                                                                                                                                                                                                                                                                         |
|         | The effect of influenza and pneumococcal vaccination in the elderly on health service utilization and costs: a claims data-based cohort study (2022) (110)                        | Elderly individuals over or equal to 60 years of age | NR                          | VCR                            | 2014-2016   | 3.22% (4,469/138.877)                                                                                                                                                                                                                                                                                                          |
| Greece  | A clinical audit of pneumococcal vaccination among patients with autoimmune rheumatic diseases living in Greece: The power of awareness (2021) (136)                              | Autoimmune rheumatic diseases                        | PCV13 ± PPV23, PPV23, PCV13 | VCR                            | 2015-2016   | Overall VCR: 49.37% (195 patients)<br>Of these:<br>- PCV13: 40.51% (79/195 patients)<br>- PPV23: 59.49% (116/195 patients)                                                                                                                                                                                                     |
|         | Vaccination Coverage of the Elderly in Greece: A Cross-Sectional Nationwide Study (2020) (82)                                                                                     | elderly people ≥60 years old                         | PPV23, PCV13                | VCR                            | 2019        | <ul style="list-style-type: none"> <li>• PPV23: 23.2% (480/2072)</li> <li>• PCV13: 49.7% (1029/2072)</li> </ul>                                                                                                                                                                                                                |
|         | The evolving epidemiology of serotype distribution and antimicrobial resistance of streptococcus pneumoniae strains isolated from adults in Crete, Greece, 2009–2016 (2018) (137) | Adults                                               | PPV23, PCV13                | VCR                            | 2009–2016   | Overall VCR:<br><ul style="list-style-type: none"> <li>• PPV23: 73.3%</li> <li>• PCV13: 37.8%</li> </ul> PCV13<br><ul style="list-style-type: none"> <li>• Elderly (&gt; 65 years): 34%</li> <li>• High risk adults: 20%</li> </ul> PPV23<br><ul style="list-style-type: none"> <li>• Elderly (&gt; 65 years): ~30%</li> </ul> |

| Country | Title (publication year)                                                                                                                                                                                                            | Description of population             | Type of vaccine               | VCR or serotype coverage rate? | Time period | Coverage rate (%)                                                                                                                                                                                                                                                       |
|---------|-------------------------------------------------------------------------------------------------------------------------------------------------------------------------------------------------------------------------------------|---------------------------------------|-------------------------------|--------------------------------|-------------|-------------------------------------------------------------------------------------------------------------------------------------------------------------------------------------------------------------------------------------------------------------------------|
| Ireland | A quality improvement initiative to improve influenza and pneumococcal vaccination rates in patients receiving biological DMARDs (bDMARDs) in the mid-west of Ireland (2020) (138)                                                  | Patients receiving biological DMARDs  | NR                            | VCR                            | 2018 - 2019 | <ul style="list-style-type: none"> <li>• First cycle: 33.7%</li> <li>• Second cycle (after implementation of a quality improvement intervention): 56.5%</li> </ul>                                                                                                      |
|         | Colonization of Irish patients with chronic obstructive pulmonary disease by Streptococcus pneumoniae and analysis of the pneumococcal vaccine coverage: a non-interventional, observational, prospective cohort study (2017) (139) | Chronic obstructive pulmonary disease | PPV23                         | VCR                            | 2014-2015   | PPV23: <ul style="list-style-type: none"> <li>• Colonized participants (n=11): 64%</li> <li>• Non-colonized participants (n=122): 61%</li> </ul>                                                                                                                        |
| Italy   | An Independent Study to Compare Compliance, Attitudes, Knowledge, and Sources of Knowledge about Pneumococcal Vaccinations among an Italian Sample of Older Adults (2022) (140)                                                     | Elderly people                        | PCV13 ± PPV23                 | VCR                            | NR          | 11.20%                                                                                                                                                                                                                                                                  |
|         | Calabria: a successful experience implementing Herpes Zoster vaccination strategies (2019) (141)                                                                                                                                    | Elderly people                        | PCV13                         | VCR                            | 2016-2017   | VCR of PCV13 in elderly people vaccinated with Herpes Zoster (HZ) vaccine: <ul style="list-style-type: none"> <li>• 65 years, those who also received HZ vaccine (n = 1693): 95.5%</li> <li>• 70 years, those who also received HZ vaccine (n = 1281): 94.4%</li> </ul> |
|         | Will vaccine hesitancy compromise our efforts to face the next SARS-CoV-2 epidemic wave? (2021) (142)                                                                                                                               | Elderly people with SARS-CoV-2        | PPV23, PCV13, PPV23 and PCV13 | VCR                            | 2019-2020   | PCV13: 11.3%<br>PPV23: 3.4%<br>PCV13 + PPV23: 5.1%<br>Overall VCR: 19.8%                                                                                                                                                                                                |
| Poland  | Invasive pneumococcal disease among patients above 65 years old (2017) (113)                                                                                                                                                        | Elderly people                        | PPV23, PCV13                  | Serotype coverage              | 2016        | PCV13: 67.0%<br>PPV23: 81.9%                                                                                                                                                                                                                                            |

| Country  | Title (publication year)                                                                                                                                         | Description of population             | Type of vaccine                                | VCR or serotype coverage rate? | Time period      | Coverage rate (%)                                                                                                                                                                                                                                                                                                                                                                                                                                                                                                                                                                                                                                                                                                 |
|----------|------------------------------------------------------------------------------------------------------------------------------------------------------------------|---------------------------------------|------------------------------------------------|--------------------------------|------------------|-------------------------------------------------------------------------------------------------------------------------------------------------------------------------------------------------------------------------------------------------------------------------------------------------------------------------------------------------------------------------------------------------------------------------------------------------------------------------------------------------------------------------------------------------------------------------------------------------------------------------------------------------------------------------------------------------------------------|
|          | Rates of vaccination against streptococcus pneumoniae in cochlear implant patients (2017) (143)                                                                  | Cochlear implant adult patients       | NR                                             | VCR                            | 2014-2016        | 5.50%                                                                                                                                                                                                                                                                                                                                                                                                                                                                                                                                                                                                                                                                                                             |
| Portugal | Chronic Obstructive Pulmonary Disease-Are We Vaccinating the Patients? (2017) (144)                                                                              | Chronic Obstructive Pulmonary Disease | PPV23, PCV13                                   | VCR                            | NR               | PPV23: 22.4%<br>PCV13: 11.5%                                                                                                                                                                                                                                                                                                                                                                                                                                                                                                                                                                                                                                                                                      |
| Slovenia | Audit of Post-Splenectomy Prophylaxis in a Single Tertiary Center in Slovenia: Where Are We and What Should Be Done? (2021) (145)                                | Post-Splenectomy Prophylaxis          | PPV23 ± PCV13                                  | VCR                            | 2010-2018        | Vaccination against pneumococcal disease (PPV23 ± PCV13): 77.5%<br>Patients after elective splenectomy: 89.0%<br>Non-elective splenectomy: 61.5%                                                                                                                                                                                                                                                                                                                                                                                                                                                                                                                                                                  |
| Spain    | Pneumococcal vaccination coverages by age, sex and specific underlying risk conditions among middle-aged and older adults in Catalonia, Spain, 2017 (2019) (146) | Adult and at-risk population          | PPV23, PCV13, PPV23 and PVC13<br>PCV13 ± PPV23 | VCR                            | Up to 1 Jan 2017 | PPV23: <ul style="list-style-type: none"> <li>• Aged 50–64 years: 9.2%</li> <li>• Aged 65–79 years: 63.1%</li> <li>• Aged ≥ 80 years: 81.2%</li> <li>• All-age groups: 38.7%</li> </ul> PCV13: <ul style="list-style-type: none"> <li>• Aged 50–64 years: 0.4%</li> <li>• Aged 65–79 years: 0.9%</li> <li>• Aged ≥ 80 years: 1.0%</li> <li>• All-age groups: 0.7%</li> </ul> PCV13 + PPV23: <ul style="list-style-type: none"> <li>• Aged 50–64 years: 0.3%</li> <li>• Aged ≥ 65 years: 0.8%</li> <li>• Overall (≥ 50 years): 0.5%</li> </ul> PCV13 or PPV23: <ul style="list-style-type: none"> <li>• Aged 50–64 years: 9.3%</li> <li>• Aged ≥ 65 years: 69.0%</li> <li>• Overall (≥ 50 years): 38.9%</li> </ul> |
| Sweden   | Cost-effectiveness of pneumococcal vaccination for elderly in Sweden (2020) (115)                                                                                | Elderly                               | PCV13 ± PPV23                                  | Serotype coverage              | NR               | Assumed 75%                                                                                                                                                                                                                                                                                                                                                                                                                                                                                                                                                                                                                                                                                                       |

| Country         | Title (publication year)                                                                                                                                                                 | Description of population                                   | Type of vaccine | VCR or serotype coverage rate? | Time period | Coverage rate (%)                                                                                                                                                                                                                                                                                                                                                                                                                                                                                                                     |
|-----------------|------------------------------------------------------------------------------------------------------------------------------------------------------------------------------------------|-------------------------------------------------------------|-----------------|--------------------------------|-------------|---------------------------------------------------------------------------------------------------------------------------------------------------------------------------------------------------------------------------------------------------------------------------------------------------------------------------------------------------------------------------------------------------------------------------------------------------------------------------------------------------------------------------------------|
| The Netherlands | Monitor Vaccinatiegraad Nationaal Programma Pneumokokkenvaccinatie Volwassenen (NPPV) 2020 (95)                                                                                          | PD                                                          | PPV23           | VCR                            | 2020        | 73% (Note: that it is 73% out of the 6.1% of the Dutch population that were invited by their GP for vaccination)                                                                                                                                                                                                                                                                                                                                                                                                                      |
|                 | Impact and cost-effectiveness of different vaccination strategies to reduce the burden of pneumococcal disease among elderly in the Netherlands (2018) (116)                             | PD                                                          | PCV13 ± PPV23   | VCR                            | 2004-2014   | Assumed 50% (This is an estimation applied to generate results for vaccination of elderly based on the uptake of influenza vaccine)                                                                                                                                                                                                                                                                                                                                                                                                   |
|                 | Incidence and risk factors for invasive pneumococcal disease and community-acquired pneumonia in human immunodeficiency virus-infected individuals in a high-income setting (2020) (147) | HIV - infected individuals in a high-income setting with PD | NR              | VCR                            | 2008 -2017  | Case (Community-acquired Pneumonia): 7.4%<br>Control: 3.7%                                                                                                                                                                                                                                                                                                                                                                                                                                                                            |
| United Kingdom  | Pneumococcal vaccine coverage among individuals aged 18 to 64 years old with underlying medical conditions in the UK: a retrospective database analysis (2020) (148)                     | Adults and at-risk population                               | NR              | VCR                            | 2011-2015   | Within 1 year of follow-up:<br>Overall VCR: 13.6% <ul style="list-style-type: none"> <li>• chronic respiratory disease: 13.9%</li> <li>• immunosuppression: 13.2%</li> <li>• diabetes mellitus: 14.4%</li> <li>• Individuals with cerebrospinal fluid leaks: 7.2%</li> </ul> Within 4 years of follow-up: <ul style="list-style-type: none"> <li>• chronic respiratory disease: 32.9%</li> <li>• immunosuppression: 32.7%</li> <li>• diabetes mellitus: 31.8%</li> <li>• Individuals with cerebrospinal fluid leaks: 21.2%</li> </ul> |

## References

1. Ludwig Boltzmann Institute [Available from: <https://bim.lbg.ac.at/en>.
2. Austrian Institute for Health Technology Assessment GmbH [Available from: <https://aihta.at/page/homepage/en>.
3. Gesundheit Österreich GmbH [Available from: <https://goeg.at/>.
4. Belgian Health Care Knowledge Centre [Available from: <https://kce.fgov.be/en>.
5. Scientific Institute of Public Health (WIV-ISP), Belgium [Available from: <https://www.sciensano.be/en>.
6. Bulgarian National Center for Public Health and Analysis [Available from: <https://ncpha.government.bg/>.
7. National Pricing and Reimbursement Council of Medicinal Products, Bulgaria [Available from: <https://www.ncpr.bg/bg/>.
8. Croatian Institute for Public Health [Available from: <https://www.hzjz.hr/en/>.
9. Ministry of Health of Cyprus [Available from: <https://www.moh.gov.cy/MOH/MOH.nsf/All/B132061A6C8F10F7C2257AFB003E0096?OpenDocument>.
10. Pediatrie Cerna [Available from: <https://www.pediatriecerna.cz/>.
11. State Institute for Drug Control, Czech Republic [Available from: <http://www.sukl.eu/>.
12. Sundhedsstyrelsen (Danish Health Authority).
13. Statens Serum Institut, Denmark [Available from: [www.ssi.dk](http://www.ssi.dk)]
14. RaTeRa - Rahvatervishoiu raamatukogu. Pneumokokkinfektsioonivastase vaktsineerimise kulutõhusus: tervisetehnologia hindamise raport TTH19 [Available from: <http://rahvatervis.ut.ee/handle/1/6466>.
15. Kansallinen rokotusasiantuntijaryhmä (National Advisory Committee on Vaccination) [Available from: <https://thl.fi/fi/web/infektiotaudit-ja-rokotukset/palvelut-ja-yhteystiedot/asiantuntijaryhmat/kansallinen-rokotusasiantuntijaryhma-krar>.
16. Commission Technique des Vaccinations (Technical Committee on Vaccination) [Available from: [https://www.has-sante.fr/jcms/c\\_2755844/fr/commission-technique-des-vaccinations](https://www.has-sante.fr/jcms/c_2755844/fr/commission-technique-des-vaccinations).
17. Haut Conseil de la santé publique [Available from: <https://www.hcsp.fr/Explore.cgi/Accueil>]
18. Standing Committee on Vaccinations [Available from: [https://www.rki.de/EN/Content/infections/Vaccination/Vaccination\\_node.html](https://www.rki.de/EN/Content/infections/Vaccination/Vaccination_node.html).
19. Institute for Quality and Efficiency in Health Care [Available from: [iqwig.de](http://www.iqwig.de)].
20. German Institute of Medical Documentation and Information [Available from: <http://www.dimdi.de/static/de/index.html>].
21. National Immunization Committee, Greece [Available from: <https://www.moh.gov.gr/articles/health/dieythynsh-dhmosias-ygieinhs/emboliasmoi/ethnikh-epitroph-emboliasmwn>]
22. VACSATC (Hungary) [Available from: <http://vacsatc.hu/?Information-in-English&pid=65>].
23. National Institute of Pharmacy and Nutrition, Hungary [Available from: [https://www.ogyei.gov.hu/main\\_page](https://www.ogyei.gov.hu/main_page)].
24. National Immunisation Advisory Committee, Ireland [Available from: <https://www.rcpi.ie/policy-and-advocacy/national-immunisation-advisory-committee/>].
25. National Immunisation Office, Ireland [Available from: <https://www.hse.ie/eng/health/immunisation/>].
26. Health Information and Quality Authority [Available from: <https://www.hiqa.ie/>].

27. National Centre for Pharmacoeconomics, Ireland [Available from: <http://www.ncpe.ie/>.
28. Istituto Superiore di Sanita [Available from: [iss.it](http://iss.it)].
29. Agenzia Italiana del Farmaco [Available from: <https://www.aifa.gov.it/en/web/guest/home>].
30. State Immunization Council of Latvia [Available from: [http://www.vm.gov.lv/lv/ministrija/konsultativas\\_padomes/imunizacijas\\_valsts\\_padome/](http://www.vm.gov.lv/lv/ministrija/konsultativas_padomes/imunizacijas_valsts_padome/)].
31. The Centre for Communicable Diseases and AIDS [Available from: <http://www.ulac.lt/>].
32. Higienos Institutas, The Institute of Hygiene, Lithuania [Available from: <http://www.hi.lt/>].
33. Le Conseil Supérieur des Maladies Infectieuses [Available from: <https://sante.public.lu/fr/espace-professionnel/recommandations/conseil-maladies-infectieuses.html>].
34. Health Council of the Netherlands [Available from: <https://www.healthcouncil.nl/>].
35. National Institute for Public Health and the Environment [Available from: <https://www.rivm.nl/>].
36. Zorginstituut Nederland [Available from: <https://www.zorginstituutnederland.nl/>].
37. Sanitary Epidemiology Board of the Polish Ministry of Health.
38. Agency for Health Technology Assessment and Tariff System, Poland [Available from: <http://www.aotm.gov.pl/www/>].
39. Comissão Técnica de Vacinação [Available from: <https://comissaovacinacao.webnode.pt/>].
40. Direção-Geral de Saúde, Portugal [Available from: <https://www.dgs.pt/>].
41. Ministry of Health - Malta. [Available from: <https://deputyprimeminister.gov.mt/en/Pages/health.aspx>].
42. Ministry of Public Health (Ministerul Sănătății), Romania [Available from: <http://www.ms.ro/>].
43. National Institute of Public Health (Institutu National De Sanatate Publica; INSP) [Available from: <https://www.insp.gov.ro/>].
44. National Centre for Communicable Diseases Surveillance and Control (CNSCBT; part of INSP) [Available from: <http://www.cnscbt.ro/>].
45. Ministry of Health of the Slovak Republic [Available from: <http://kategorizacia.mzsr.sk/Lieky/Common/Details/9376>].
46. Advisory Committee on Immunization - Posvetovalna skupina za cepljenje.
47. The Public Agency of the Republic of Slovenia for Medicinal Products and Medical Devices [Available from: <https://www.jazmp.si/en/>].
48. Ministry of Health of the Republic of Slovenia [Available from: <http://www.mz.gov.si/en/>].
49. National Vaccines Committee of Spain [Available from: <https://www.mschs.gob.es/organizacion/consejoInterterri/home.htm>].
50. Agencia de Evaluación de Tecnologías Sanitarias [Available from: <https://www.isciii.es/QuienesSomos/CentrosPropios/AETS/Paginas/default.aspx>].
51. Agencia Española de Medicamentos y Productos Sanitarios [Available from: <https://www.aemps.gob.es/>].
52. Public Health Agency of Sweden [Available from: <https://www.folkhalsomyndigheten.se/the-public-health-agency-of-sweden/>].
53. Directorate of Health (Embaetti Landlaeknir) [Available from: <https://www.landlaeknir.is/>].
54. Norwegian Institute of Public Health [Available from: <https://www.fhi.no/en/>].
55. Norwegian Directorate of Health [Available from: <https://helsedirektoratet.no/english>].
56. Norwegian Medicines Agency [Available from: [www.legemiddelverket.no](http://www.legemiddelverket.no)].
57. Federal Office of Public Health [Available from: <https://www.bag.admin.ch/bag/en/home.html>].

58. Commission fédérale pour les vaccinations - Federal Commission for Vaccines (Switzerland) [Available from: <https://www.bag.admin.ch/bag/fr/home/das-bag/organisation/ausserparlamentarische-kommissionen/eidgenoessische-kommission-fuer-impffragen-ekif.html>].
59. Joint Committee on Vaccination and Immunisation [Available from: <https://www.gov.uk/government/groups/joint-committee-on-vaccination-and-immunisation>].
60. National Institute for Health and Care Excellence [Available from: <https://www.nice.org.uk/>].
61. Scottish Medicines Consortium [Available from: <https://www.scottishmedicines.org.uk/>].
62. All Wales Medicines Strategy Group [Available from: <http://www.awmsg.org/>].
63. Health Technology Wales, Technoleg Iechyd Cymru [Available from: <https://www.healthtechnology.wales/>].
64. National Institute for Health Research [Available from: <https://www.nihr.ac.uk/>].
65. Council SH. Avis 9674 - Vaccination antipneumococcique (adultes). 2022.
66. De Burghgraeve T, Henrard S, Verboven B, Van Pottelbergh G, Vaes B, Mathei C. The incidence of lower respiratory tract infections and pneumococcal vaccination status in adults in Flemish primary care. *Acta Clinica Belgica*. 2021;76(5):335-45.
67. SST. Tilbud om pneumokokvaccination til særlige risikogrupper. 2020.
68. SSI. Pneumokokvaccine 23-valent (Pneumovax). 2022.
69. SST. Tilskud til vacciner til visse persongrupper. 2022.
70. Ratera. Vaccination of adults.
71. Esposito S, Franco E, Gavazzi G, de Miguel AG, Hardt R, Kassianos G, et al. The public health value of vaccination for seniors in Europe. *Vaccine*. 2018;36(19):2523-8.
72. Bhavsar AB, Olbrecht J, Izurieta P. PIN33 COST-EFFECTIVENESS OF CURRENT PNEUMOCOCCAL VACCINES IN OLDER ADULTS IN EUROPEAN SETTINGS: A SYSTEMATIC LITERATURE REVIEW. *Value in Health*. 2019;22:S645.
73. THL (Finnish Institute for Health and Welfare). Pneumokokkrokotusstrategiat. 2018:1-52.
74. THL (Finnish Institute for Health and Welfare). Riskiryhmien pneumokokkrokotukset. 2022.
75. HCSP. Infections à pneumocoque : recommandations vaccinales pour les adultes. 2017.
76. HAS. Vaccination contre les infections à pneumocoque en contexte de pénurie de vaccin pneumococcique non conjugué 23-valent. 2017.
77. Wyplosz B, Fernandes J, Sultan A, Roche N, Roubille F, Loubet P, et al. Pneumococcal and influenza vaccination coverage among at-risk adults: A 5-year French national observational study. *Vaccine*. 2022;40(33):4911-21.
78. Kopp A, Mangin O, Gantzer L, Lekens B, Simoneau G, Ravelomanantsoa M, et al. Pneumococcal vaccination coverage in France by general practitioners in adults with a high risk of pneumococcal disease. *Human Vaccines & Immunotherapeutics*. 2021;17(1):162-9.
79. Kuchenbecker U, Chase D, Reichert A, Schiffner-Rohe J, Atwood M. Estimating the cost-effectiveness of a sequential pneumococcal vaccination program for adults in Germany. *PloS one*. 2018;13(5):e0197905.
80. Paparoupa M. Pneumokokken-Impfung im Erwachsenenalter. *Praevention und Rehabilitation*. 2017;29(3):106.
81. Mohr A, Plentz A, Sieroslowski A, Pezenburg F, Koch M, Bauernfeind S, et al. Adherence to STIKO recommendations in patients with pulmonary disease in southeast Germany. *Infection*. 2021;49(6):1319-23.

82. Papagiannis D, Rachiotis G, Mariolis A, Zafiriou E, Gourgoulialis KI. Vaccination coverage of the elderly in Greece: a cross-sectional nationwide study. *Canadian Journal of Infectious Diseases and Medical Microbiology*. 2020;2020.
83. VACSATC. FELNŐTTEKNEK AJÁNLOTT VÉDŐOLTÁSOK. 2017.
84. Landlaeknir) DoHE. Pneumokokkasýking, ífarandi. 2019.
85. Office NI. *Pneumococcal Infection*. 2018:1-12.
86. ISS. Guida alla controindicazioni. 2018.
87. AIFA. L'uso dei Farmaci in Italia Rapporto Nazionale Anno 2020. 2020.
88. Guerrini G, Franzetti F, Giacomelli R, Meroni L, Riva A, Scirè CA, et al. Italian recommendations for influenza and pneumococcal vaccination in adult patients with autoimmune rheumatic diseases. *Clinical and experimental rheumatology*. 2019;38(2):245-56.
89. ULAC. The number of people vaccinated against pneumococcal infection has increased. 2021.
90. CSMI. Infections invasives à Pneumocoques. 2022.
91. RIVM. Pneumokokkenvaccinatie Factsheet. 2022.
92. Zorginstituut. Vaccinatie pneumokokken 60-plussers buiten Zorgverzekeringswet om financieren. 2018.
93. Zorginstituut. Verslag van de vergadering van de Wetenschappelijke Adviesraad (WAR) over 13-valente pneumokokken-polysacharidenconjugaatvaccin (Prevenar®). 2021.
94. RIVM. Pneumokokkenziekte Richtlijn. 2022.
95. RIVM. Monitor Vaccinatiegraad Nationaal Programma Pneumokokkenvaccinatie Volwassenen (NPPV) 2020. 2020.
96. Folkehelseinstituttet. Pneumokokkvaksine til risikogrupper. 2020.
97. AOTMiT. Protokół nr 15/2022 z posiedzenia Rady Przejrzystości. 2022.
98. AOTMiT. Opinia Prezesa Agencji Oceny Technologii Medycznych i Taryfikacji nr 25/2021 z dnia 30 kwietnia 2021 r. o projekcie programu polityki zdrowotnej „Program profilaktyki zakażeń pneumokokowych u osób powyżej 65 roku życia”. 2021.
99. DGS. PROGRAMA NACIONAL DE VACINAÇÃO. 2022.
100. INSP. Luna Națională a informării despre VACCINARE aprilie 2022. 2022.
101. Health Mo. Farmako-ekonomický rozbor lieku. 2017.
102. PSC. POVZETEK GLAVNIH ZNAČILNOSTI ZDRAVILA. 2021.
103. PSC. Priporočila za cepljenje odraslih in otrok, starih 5 let in več, proti pnevmokoknim okužbam. 2019.
104. AEMPS. CONSEJO INTERTERRITORIAL DEL SISTEMA NACIONAL DE SALUD VACUNACIÓN ESPECÍFICA EN PERSONAS ADULTAS (≥18 AÑOS) CON CONDICIONES DE RIESGO. 2022.
105. CFV. Eidgenössische Kommission für Impffragen Protokoll der 88. Plenarsitzung. 2022.
106. JCVI. Minute of the JCVI Pneumococcal Sub-Committee meeting 2022.
107. Walter E, Eichhofer G, Voit M. PIN32 - A PUBLIC HEALTH AND BUDGET IMPACT ANALYSIS (BIA) OF VACCINATING ADULTS AGAINST PNEUMOCOCCAL-DISEASES IN AUSTRIA. *Value in Health*. 2019;22:S645.
108. Marbaix S, Peetermans WE, Verhaegen J, Annemans L, Sato R, Mignon A, et al. Cost-effectiveness of PCV13 vaccination in Belgian adults aged 65-84 years at elevated risk of pneumococcal infection. *Plos one*. 2018;13(7):e0199427.



109. Birck AM, Nordin Christensen L, Pedersen MH, Olsen J, Johnson KD, Bencina G, et al. Health economic evaluation of introducing a PPSV23-based vaccination programme to adults aged 65 and above, and an extension to the 60-64 age group in Denmark. *Expert Review of Vaccines*. 2021;20(10):1327-37.
110. Storch J, Fleischmann-Struzek C, Rose N, Lehmann T, Mikolajetz A, Maddela S, et al. The effect of influenza and pneumococcal vaccination in the elderly on health service utilisation and costs: a claims data-based cohort study. *The European Journal of Health Economics*. 2022;23(1):67-80.
111. Boccalini S, Bechini A, Gasparini R, Panatto D, Amicizia D, Bonanni P. Economic studies applied to vaccines against invasive diseases: An updated budget impact analysis of age-based pneumococcal vaccination strategies in the elderly in Italy. *Human Vaccines & Immunotherapeutics*. 2017;13(2):417-22.
112. Sanduzzi A, Canora A, Belfiore P, Bocchino M, Liguori R, Liguori G. Impact of 13Valent Vaccine for Prevention of Pneumococcal Diseases in Children and Adults at Risk: Possible Scenarios in Campania Region. *Infectious Disorders-Drug Targets (Formerly Current Drug Targets-Infectious Disorders)*. 2019;19(4):403-8.
113. Wróbel I, Kuch A, Waśko I, Gołębiewska A, Ronkiewicz P, Kiedrowska M, et al. Postępy Mikrobiologii - Invasive pneumococcal disease among patients above 65 years old. *POLSKIE TOWARZYSTWO MIKROBIOLOGÓW*2017.
114. Gouveia M, Jesus G, Inês M, Costa J, Borges M. Cost-effectiveness of the 13-valent pneumococcal conjugate vaccine in adults in Portugal versus “no vaccination” and versus vaccination with the 23-valent pneumococcal polysaccharide vaccine. *Human Vaccines & Immunotherapeutics*. 2019;15(4):850-8.
115. Wolff E, Storsaeter J, Örtqvist Å, Naucner P, Larsson S, Lepp T, et al. Cost-effectiveness of pneumococcal vaccination for elderly in Sweden. *Vaccine*. 2020;38(32):4988-95.
116. Thorrington D, Van Rossum L, Knol M, De Melker H, Rümke H, Hak E, et al. Impact and cost-effectiveness of different vaccination strategies to reduce the burden of pneumococcal disease among elderly in the Netherlands. *PLoS One*. 2018;13(2):e0192640.
117. Willem L, Blommaert A, Hanquet G, Thiry N, Bilcke J, Theeten H, et al. Economic evaluation of pneumococcal vaccines for adults aged over 50 years in Belgium. *Human vaccines & immunotherapeutics*. 2018;14(5):1218-29.
118. Sevilla J, Stawasz A, Burnes D, Poulsen P, Sato R, Bloom D. Calculating the indirect costs of adult pneumococcal disease and the rate of return to the 13-valent pneumococcal conjugate vaccine (PCV13) in older adults, with an application to Denmark. *Value in Health*. 2017;20(9):A787.
119. Alexander Kuhlmann J-MGVDS. Serotype dynamics in pneumococcal diseases and the performance of vaccination strategies for older adults in Germany. 2020.
120. Gomez SC, Jiang Y, Lu X, Pulfer GN, Boix PR. PIN44-ECONOMIC EVALUATION OF 60+ YEARS ADULT VACCINATION STRATEGY USING PNEUMOCOCCAL POLYSACCHARIDE VACCINE IN SPAIN. *Value in Health*. 2018;21:S228.
121. Rozenbaum M, editor 1434. Cost-Effectiveness of Sequential Vaccination With the 13-Valent Pneumococcal Conjugate Vaccine (PCV13) Followed by the 23 Valent Polysaccharide Vaccine (PPV23) in The Netherlands. *Open Forum Infectious Diseases*; 2018: Oxford University Press.
122. de Vries L, Kellerborg K, Brouwer W, van Baal P. Don't forget about the future: The impact of including future costs on the cost-effectiveness of adult pneumococcal conjugate vaccination with PCV13 in the Netherlands. *Vaccine*. 2021;39(29):3834-43.

123. Zeevat F, van der Schans J, Boersma W, Boersma C, Postma MJ. Cost-effectiveness analysis on elderly pneumococcal vaccination in the Netherlands: Challenging the Dutch Health Council's advice. *Vaccine*. 2019;37(43):6282-4.
124. Rozenbaum M, editor 1439. The Cost-Effectiveness of Vaccinating Adults at Increased Risk of Pneumococcal Disease Against Pneumococcal Disease in The Netherlands. *Open Forum Infectious Diseases*; 2018: Oxford University Press.
125. Bauer A, Tiefengraber D, Wiedermann U. Towards understanding vaccine hesitancy and vaccination refusal in Austria. *Wiener klinische Wochenschrift*. 2021;133(13):703-13.
126. Butić I, Gužvinec M, Jelić M, Groš I, Lucić S, Bošnjak M, et al. Serotype distribution and antimicrobial resistance of invasive *Streptococcus pneumoniae* isolates among Croatian adults during a fifteen year period (2005-2019). *Croatian Medical Journal*. 2022;63(2):156-65.
127. Larsen L NM, Johansen I. The coverage of influenza and pneumococcal vaccination among HIV-infected patients in Denmark: a cross-sectional survey. *Journal of the International AIDS Society*. 2018;21.
128. Larsen L, Bistrup C, Sørensen SS, Boesby L, Nguyen MTT, Johansen IS. The coverage of influenza and pneumococcal vaccination among kidney transplant recipients and waiting list patients: A cross-sectional survey in Denmark. *Transplant Infectious Disease*. 2021;23(3):e13537.
129. Runyo F, Maignon M, Audureau E, Vindrios W, Boueilh A, Gomart C, et al. Infectious disease consultation is effective in boosting vaccine coverage in patients awaiting kidney transplantation: A French prospective study. *Transplant Infectious Disease*. 2021;23(4):e13607.
130. Monier A, Puyade M, Hernanz MG, Bouchaert P, Leleu X, Tourani J, et al. Observational study of vaccination in cancer patients: How can vaccine coverage be improved? *Medicine Et Maladies Infectieuses*. 2020;50(3):263-8.
131. Contou D, Coudroy R, Colin G, Tadié J-M, Cour M, Sonnevill R, et al. Pneumococcal purpura fulminans in asplenic or hyposplenic patients: a French multicenter exposed-unexposed retrospective cohort study. *Critical Care*. 2020;24(1):1-8.
132. Tubiana S, Labarere J, Levraut J, Michelet P, de Vaux FJ, Doumenc B, et al. Effectiveness of a Multifaceted Informational-Based and Text Message Reminders on Pneumococcal and Influenza Vaccinations in Hospital Emergency Departments: A Cluster-Randomized Controlled Trial. *Vaccines*. 2021;9(9):962.
133. Schmedt N, Schiffner-Rohe J, Sprenger R, Walker J, von Eiff C, Häckl D. Pneumococcal vaccination rates in immunocompromised patients—a cohort study based on claims data from more than 200,000 patients in Germany. *PLoS One*. 2019;14(8):e0220848.
134. Mertsch P, Rademacher J, de Roux A, Barten G, Diel R, Gert E, et al. PROGNOSIS-the German Bronchiectasis Registry: first results. *Eur Respiratory Soc*; 2017.
135. Weinmayr L-M, Steinhäuser J, Gehring SC, Goetz K. Vaccination management for elderly patients in primary care settings—documentation and responsibilities during a vaccination campaign. Patient preference and adherence. 2019;13:1295.
136. Constantinou CA, Ziogas DC, Venetsanopoulou A, Gamaletsou MN, Koutsogeorgopoulou L, Barbouni A, et al. A clinical audit of pneumococcal vaccination among patients with autoimmune rheumatic diseases living in Greece: The power of awareness. *Vaccine*. 2021;39(11):1593-7.
137. Maraki S, Mavromanolaki VE, Stafylaki D, Hamilos G, Samonis G. The evolving epidemiology of serotype distribution and antimicrobial resistance of *streptococcus pneumoniae* strains isolated from adults in Crete, Greece, 2009–2016. *Infection & Chemotherapy*. 2018;50(4):328-39.
138. Ng WL, Anjum A, Sebastian A, Devlin J, Fraser A. P04 A quality improvement initiative to improve influenza and pneumococcal vaccination rates in patients receiving biological DMARDs (bDMARDs) in the mid-west of Ireland. *Rheumatology*. 2020;59(Supplement\_2):keaa111. 003.

139. McCarthy H, Jackson M, Corcoran M, McElligott M, MacHale E, Sulaiman I, et al. Colonisation of Irish patients with chronic obstructive pulmonary disease by *Streptococcus pneumoniae* and analysis of the pneumococcal vaccine coverage: a non-interventional, observational, prospective cohort study. *BMJ open*. 2017;7(7):e013944.
140. Suitner C, Salvador Casara BG, Maggi S, Baldo V. An Independent Study to Compare Compliance, Attitudes, Knowledge, and Sources of Knowledge about Pneumococcal Vaccinations among an Italian Sample of Older Adults. *Vaccines*. 2022;10(4):490.
141. Giuffrida S. Calabria: a successful experience implementing Herpes Zoster vaccination strategies. *Aging Clinical and Experimental Research*. 2019;31(3):421-3.
142. Sticchi L, Taramasso L, Di Biagio A, Olobardi D, Icardi G, Bassetti M. Will vaccine hesitancy compromise our efforts to face the next SARS-CoV-2 epidemic wave? *Human Vaccines & Immunotherapeutics*. 2021;17(6):1664-5.
143. Piotrowska A, Paradowska-Stankiewicz I, Skarżyński H. Rates of vaccination against *Streptococcus pneumoniae* in cochlear implant patients. *Medical Science Monitor: International Medical Journal of Experimental and Clinical Research*. 2017;23:4567.
144. Tavares J, Cruz AR, Nogueira R. Chronic Obstructive Pulmonary Disease—Are We Vaccinating the Patients? : *Eur Respiratory Soc*; 2017.
145. Horvat M, Robnik B, Bizjak K, Vuzem S, Miksić NG. Audit of Post-Splenectomy Prophylaxis in a Single Tertiary Center in Slovenia: Where Are We and What Should Be Done? *Surgical Infections*. 2021;22(3):292-8.
146. Vila-Córcoles A, Ochoa-Gondar O, de Diego C, Satué E, Vila-Rovira A, Aragón M. Pneumococcal vaccination coverages by age, sex and specific underlying risk conditions among middle-aged and older adults in Catalonia, Spain, 2017. *Eurosurveillance*. 2019;24(29):1800446.
147. Garcia Garrido HM, Mak AM, Wit FW, Wong GW, Knol MJ, Vollaard A, et al. Incidence and risk factors for invasive pneumococcal disease and community-acquired pneumonia in human immunodeficiency virus–infected individuals in a high-income setting. *Clinical Infectious Diseases*. 2020;71(1):41-50.
148. Matthews I, Lu X, Xia Q, Black W, Nozad B. Pneumococcal vaccine coverage among individuals aged 18 to 64 years old with underlying medical conditions in the UK: A retrospective database analysis. *BMC Public Health*. 2020;20(1):1-10.
